# Supplementary material for: Nature redux: interrogating biomorphism and soft robot aesthetics through generative AI
Source: PubMed Central journal article supplement (PMC11543949; doi:10.3389/frobt.2024.1472051), 2024-10-25

# Content Analysis - EXP.1

## 64 TTI generated images

### SETTINGS

Prompt: ((full-body image of a soft robot with a biologically inspired and biomorphic visual appearance, form and surface texture, set in a photo studio:1.3)), (photo studio setting:1.5), (soft robot made from organic looking material:2), ((soft materials)), pliable, (biomorphic form)), (robot surface has vivid organic polychromatic coloring and nuances:1.3), (biomorphic robot), (organic form), ((soft natural organism)), asymmetrical, bulbous, rugged, arciform, sweeping, annular, undulating and irregular contours, photography, RAW, DSLR, high resolution, HiRes, High quality

Negative prompt: (plastic), ((metal)), painting, drawing, cartoon, rendering, 3D, computer graphics, saturated, blurry, ((low resolution)), LoRes, (bad quality)

Steps: 50, Sampler: Euler a, CFG scale: 9, Size: 512x512, Model hash: 6ce0161689, Model: v1-5-pruned-emaonly, Version: v1.6.0

Time required to generate image set: 102 minutes 57.6 seconds

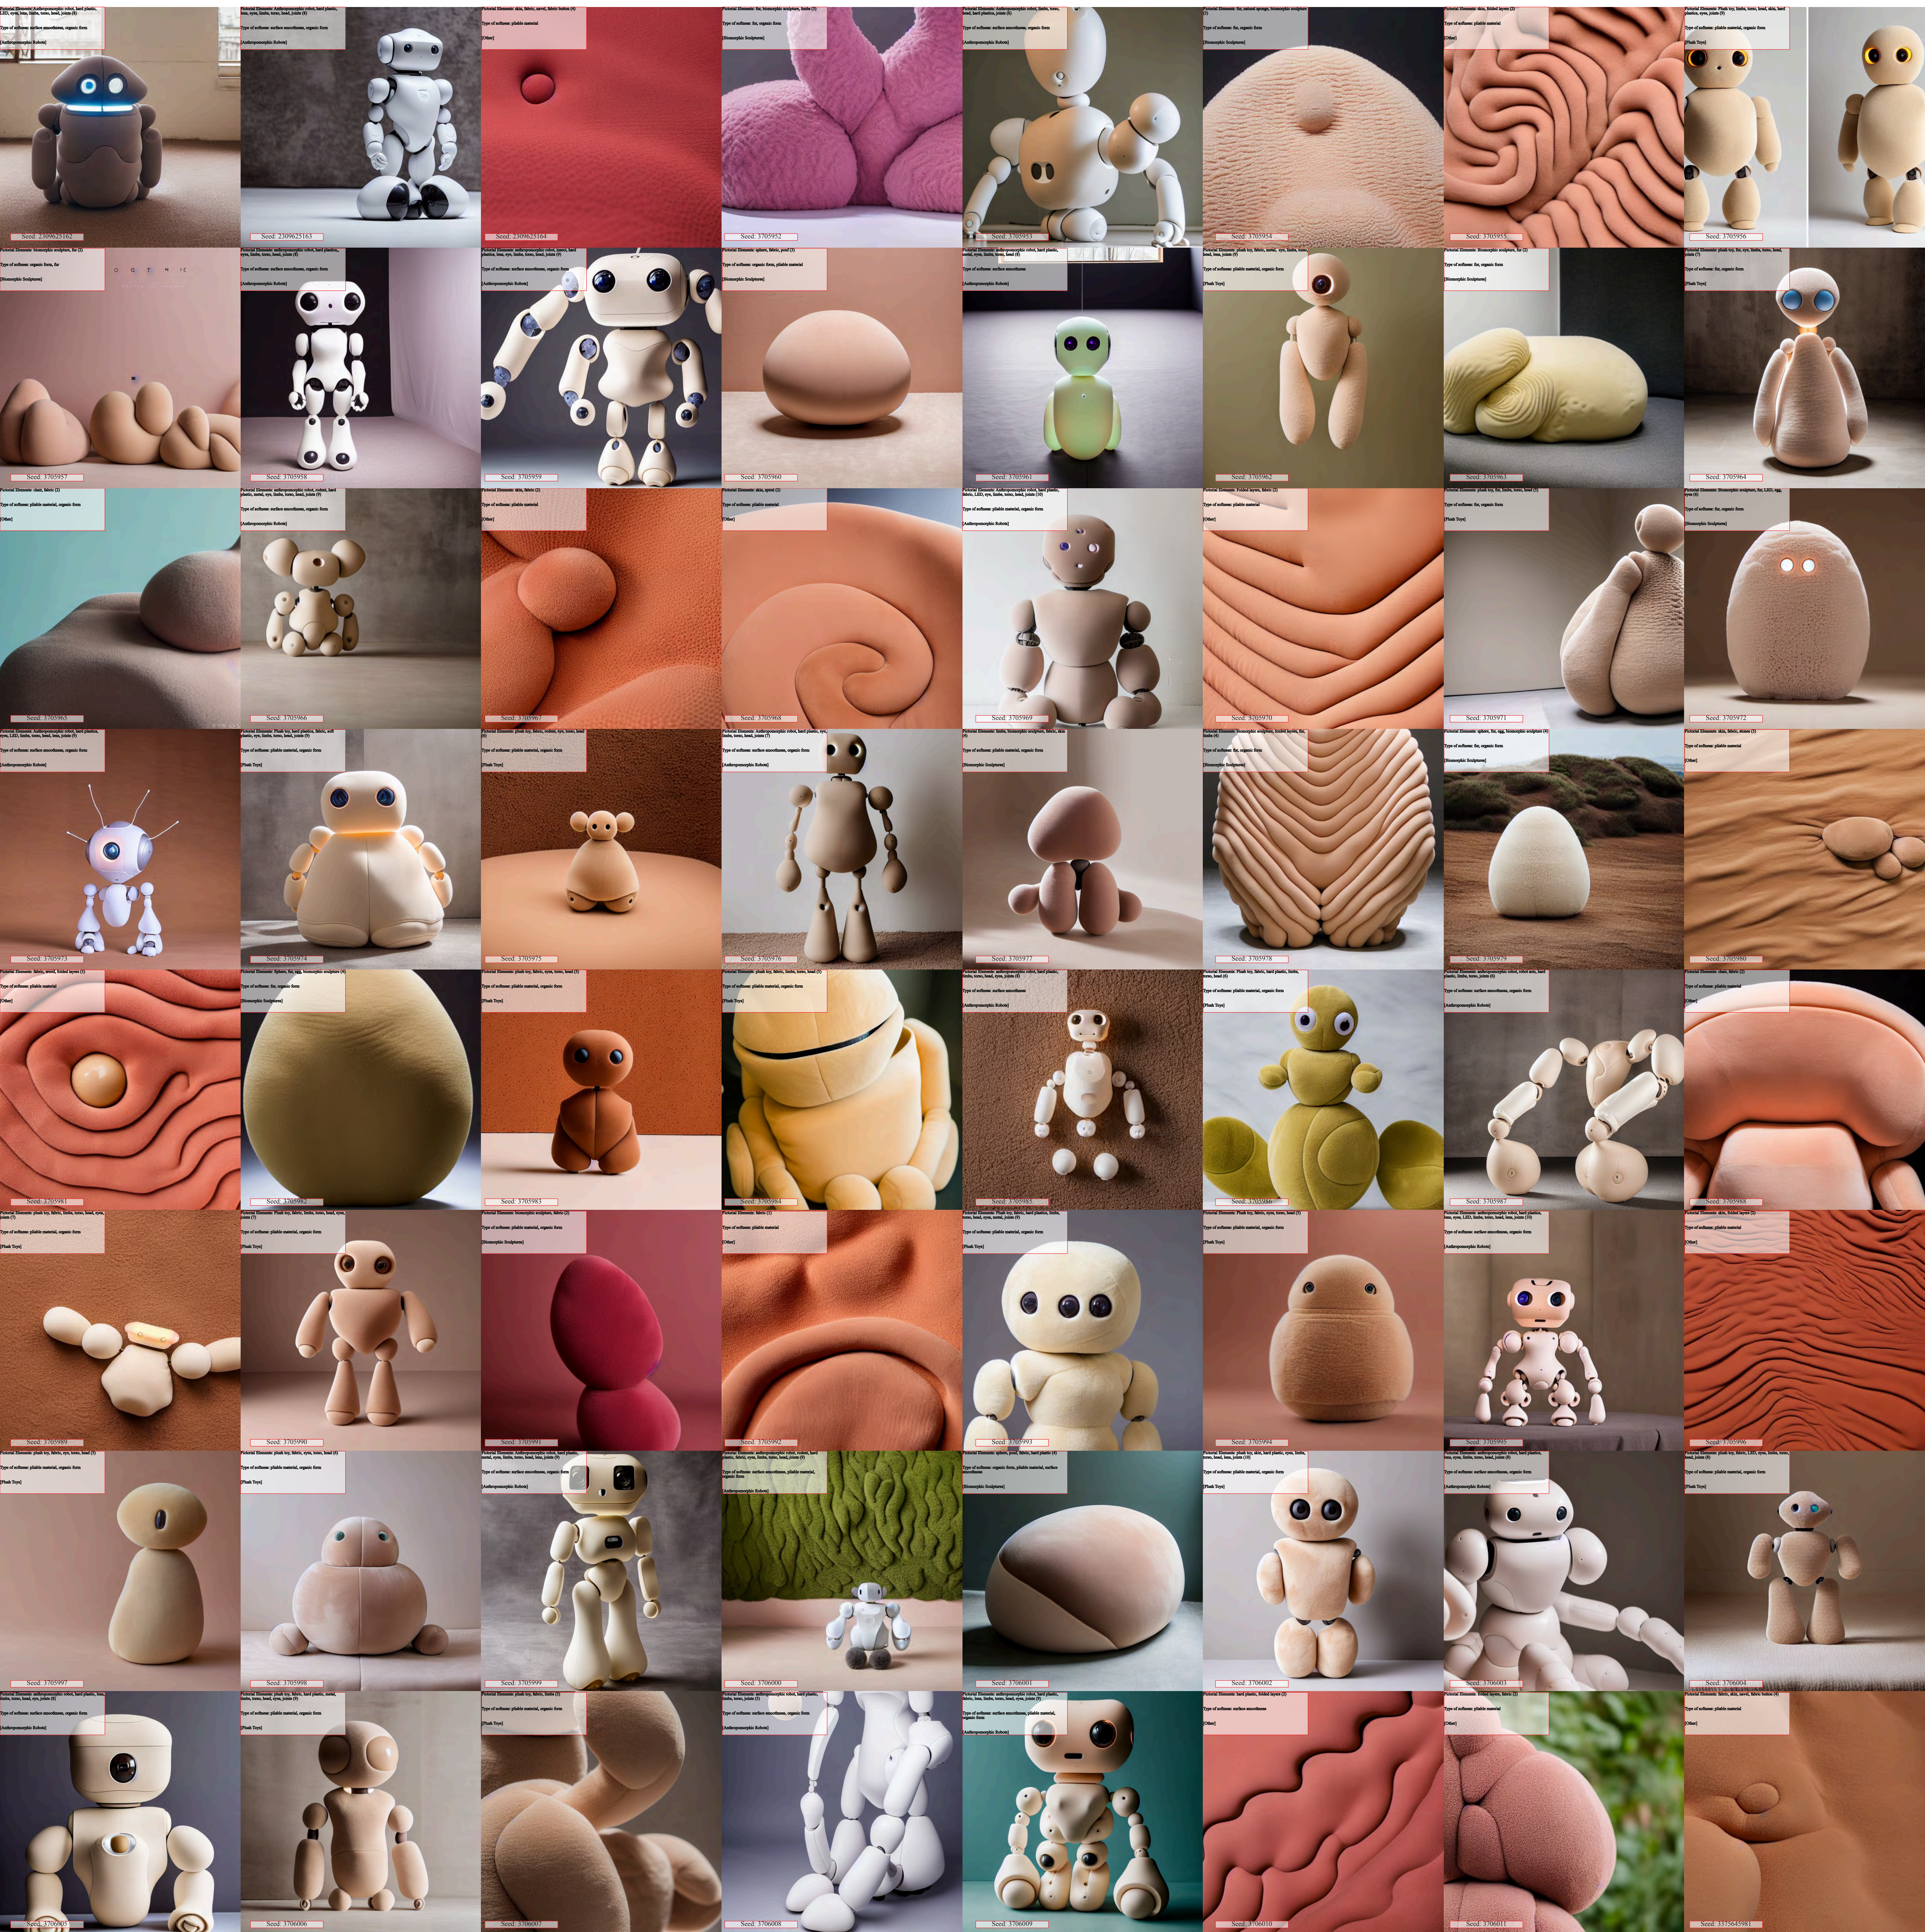

|    | <b>Pictorial Element</b> | <b>Number of Occurrences</b> |
|----|--------------------------|------------------------------|
| 1  | Torso                    | 37                           |
| 2  | Limb(s)                  | 36                           |
| 3  | Head(s)                  | 35                           |
| 4  | Eye(s)                   | 31                           |
| 5  | Fabric                   | 30                           |
| 6  | Hard plastic             | 28                           |
| 7  | Joints                   | 28                           |
| 8  | Anthropomorphic robot    | 20                           |
| 9  | Glass                    | 20                           |
| 10 | Plush toy                | 18                           |
| 11 | Skin                     | 12                           |
| 12 | Fur                      | 11                           |
| 13 | Biomorphic sculpture     | 10                           |
| 14 | LED(s)                   | 7                            |
| 15 | Folded layers            | 6                            |
| 16 | Lens(es)                 | 6                            |
| 17 | Metal                    | 6                            |
| 18 | Sphere(s)                | 4                            |
| 19 | Rodent                   | 3                            |
| 20 | Egg                      | 3                            |
| 21 | Navel                    | 2                            |
| 22 | Fabric button            | 2                            |
| 23 | Pouf                     | 2                            |
| 24 | Chair                    | 2                            |
| 25 | Robot arm                | 1                            |
| 26 | Soft plastic             | 1                            |
| 27 | Natural sponge           | 1                            |
| 28 | Spiral                   | 1                            |
| 29 | Insect                   | 1                            |
| 30 | Stone(s)                 | 1                            |
| 31 | Fungus                   | 1                            |
| 32 | Wood                     | 1                            |

# Anthropomorphic Robots (n=19)

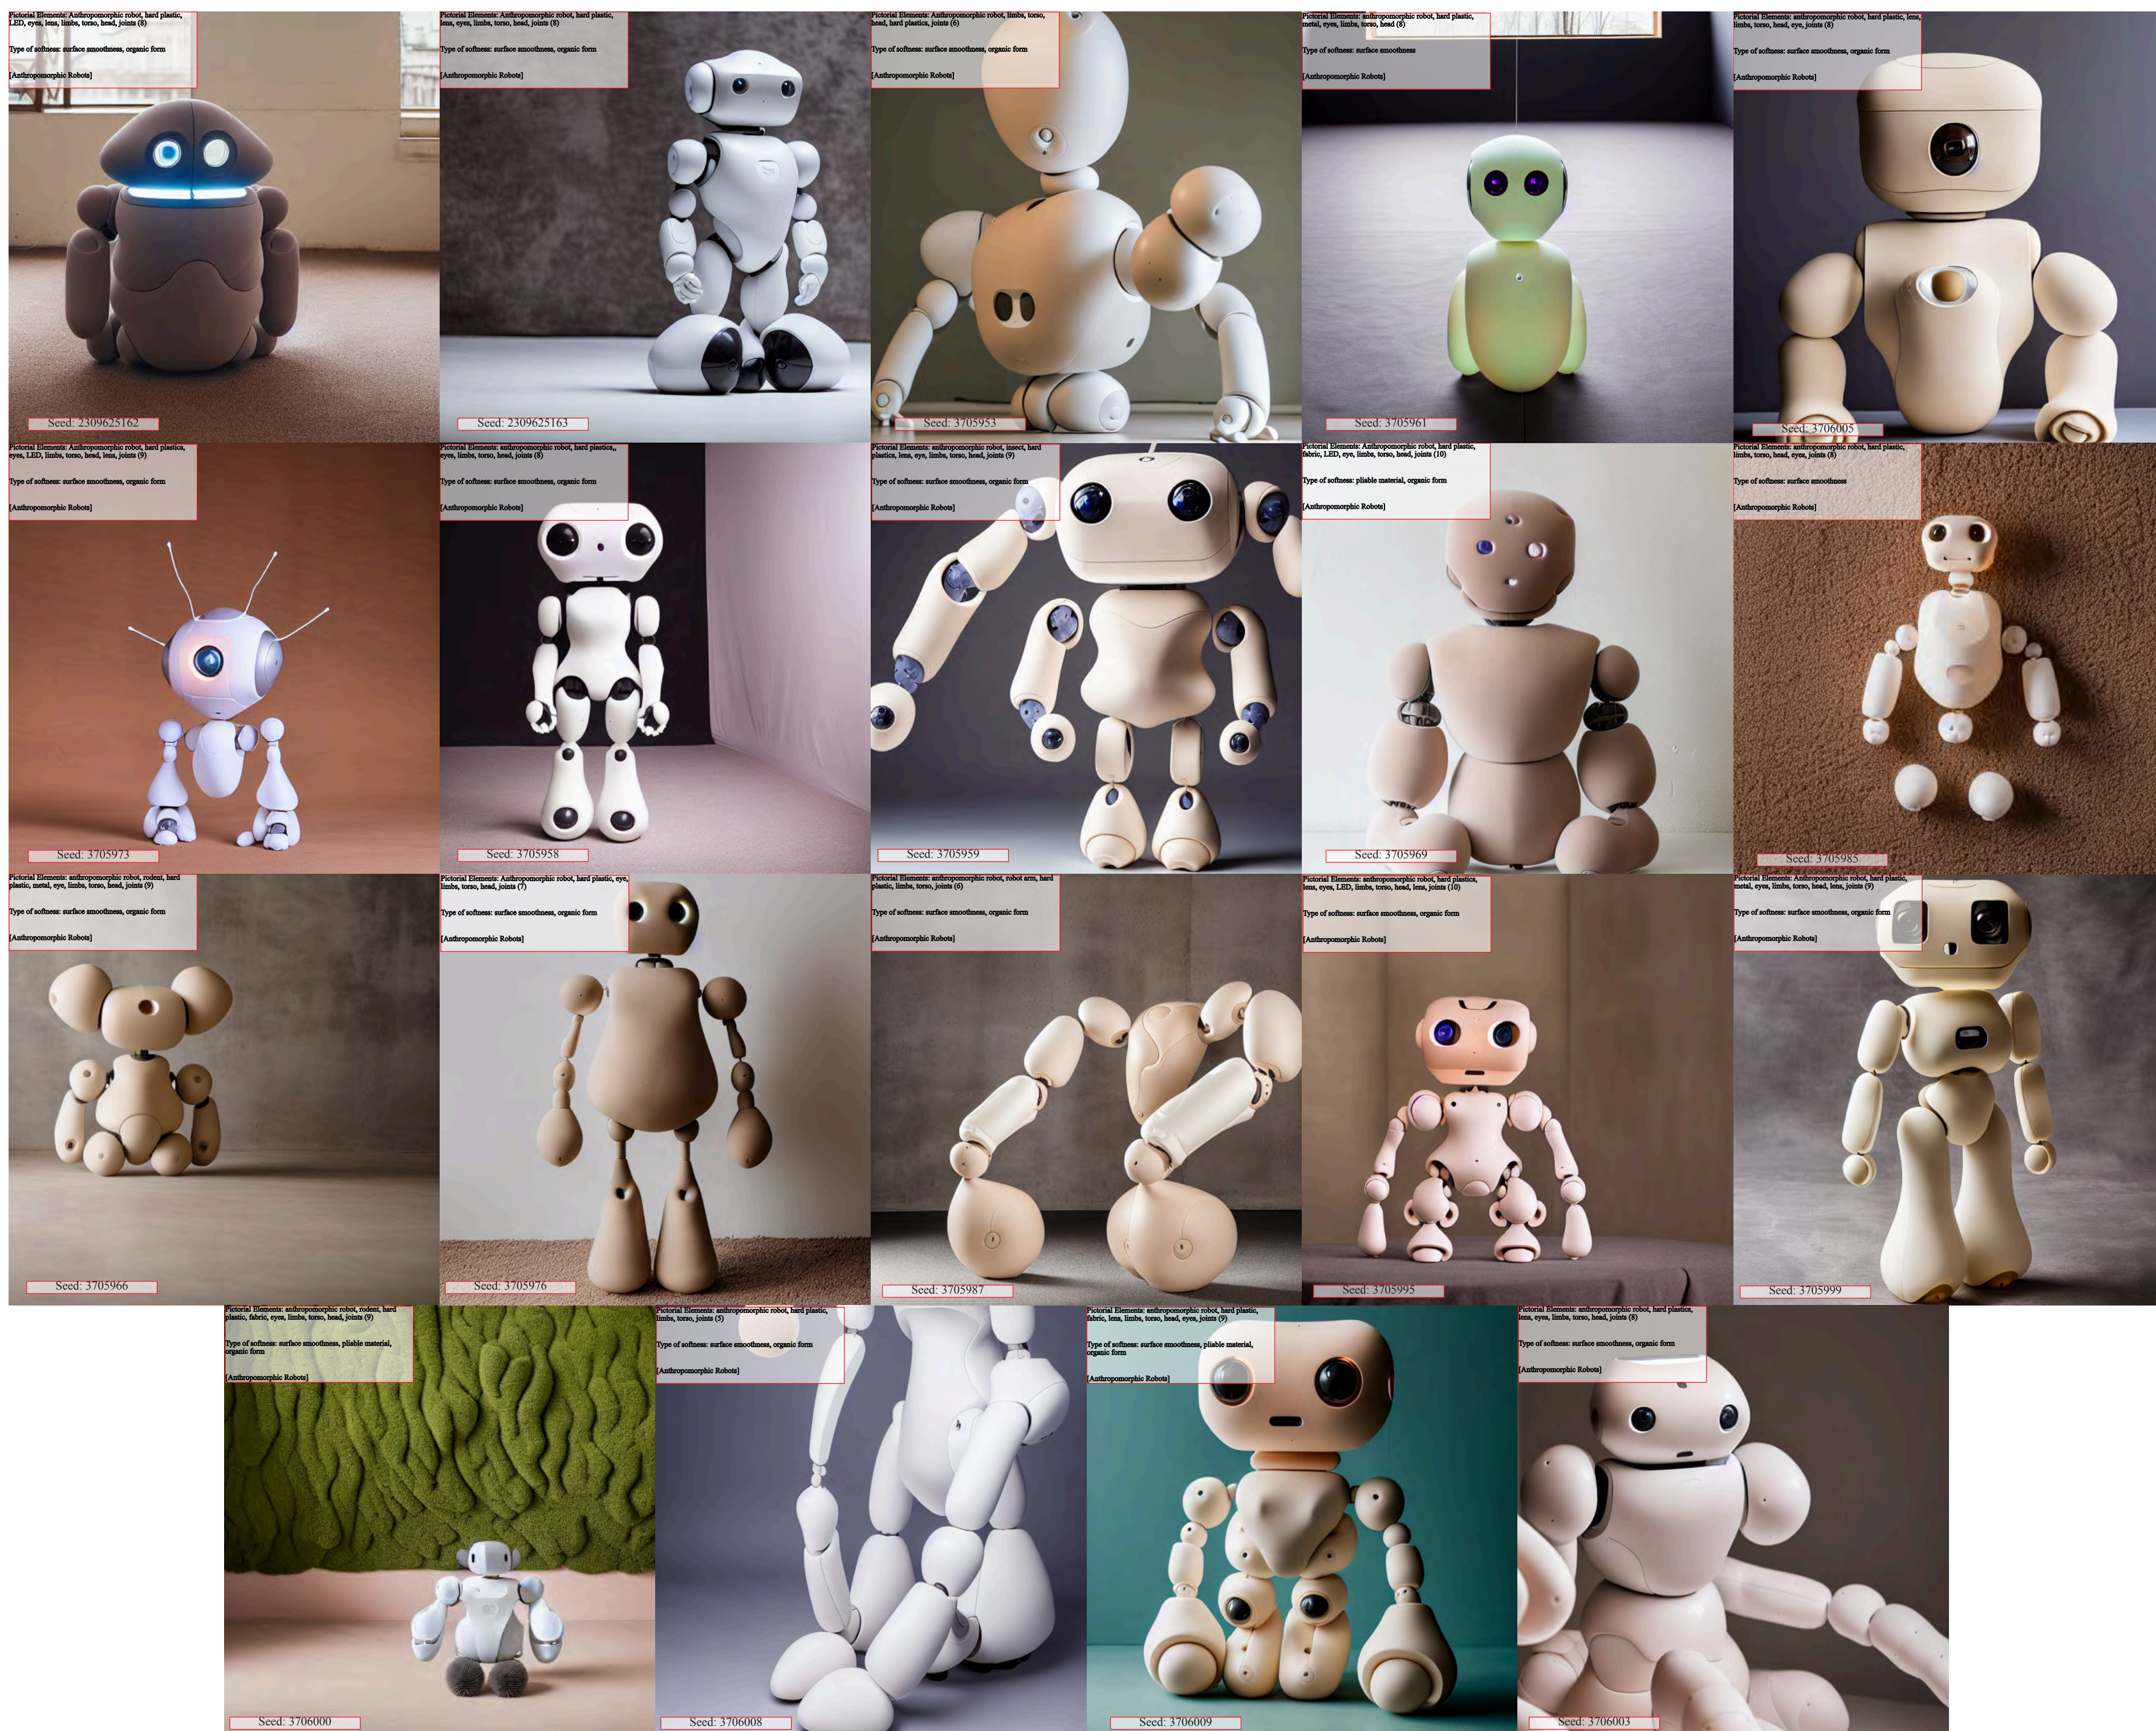

# Plush Toys (n=19)

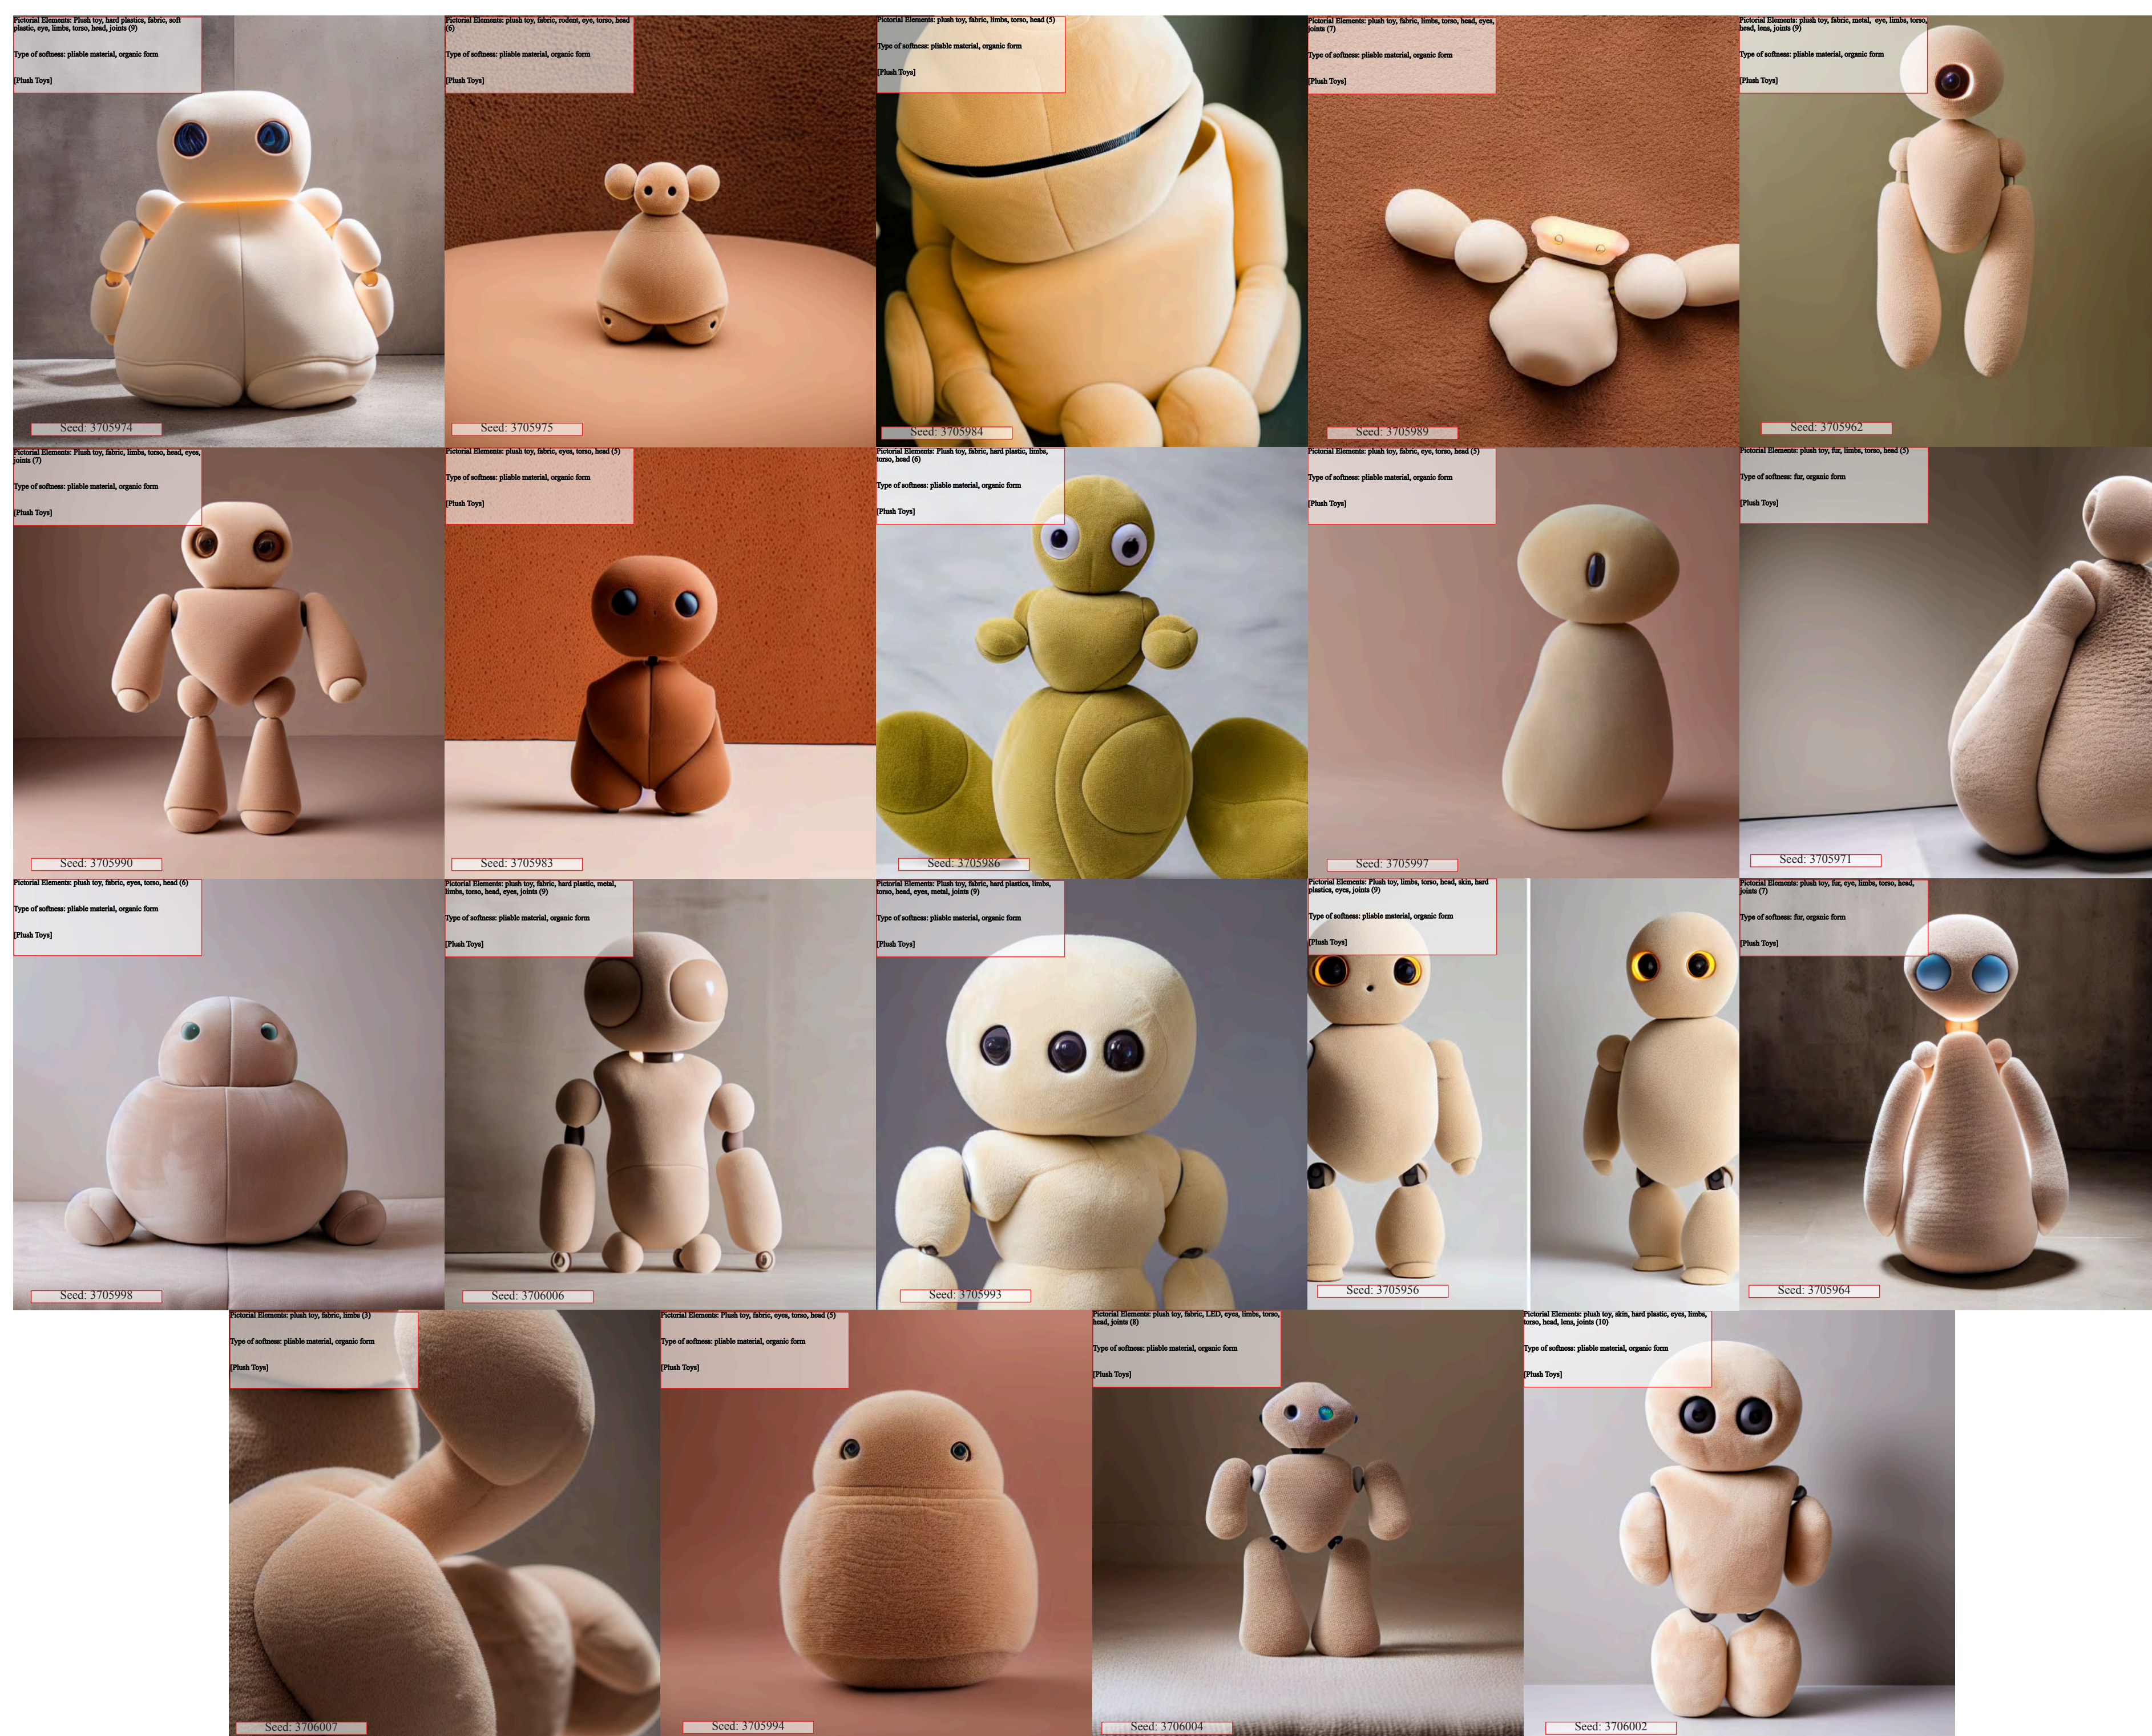

# Biomorphic Sculptures (n=12)

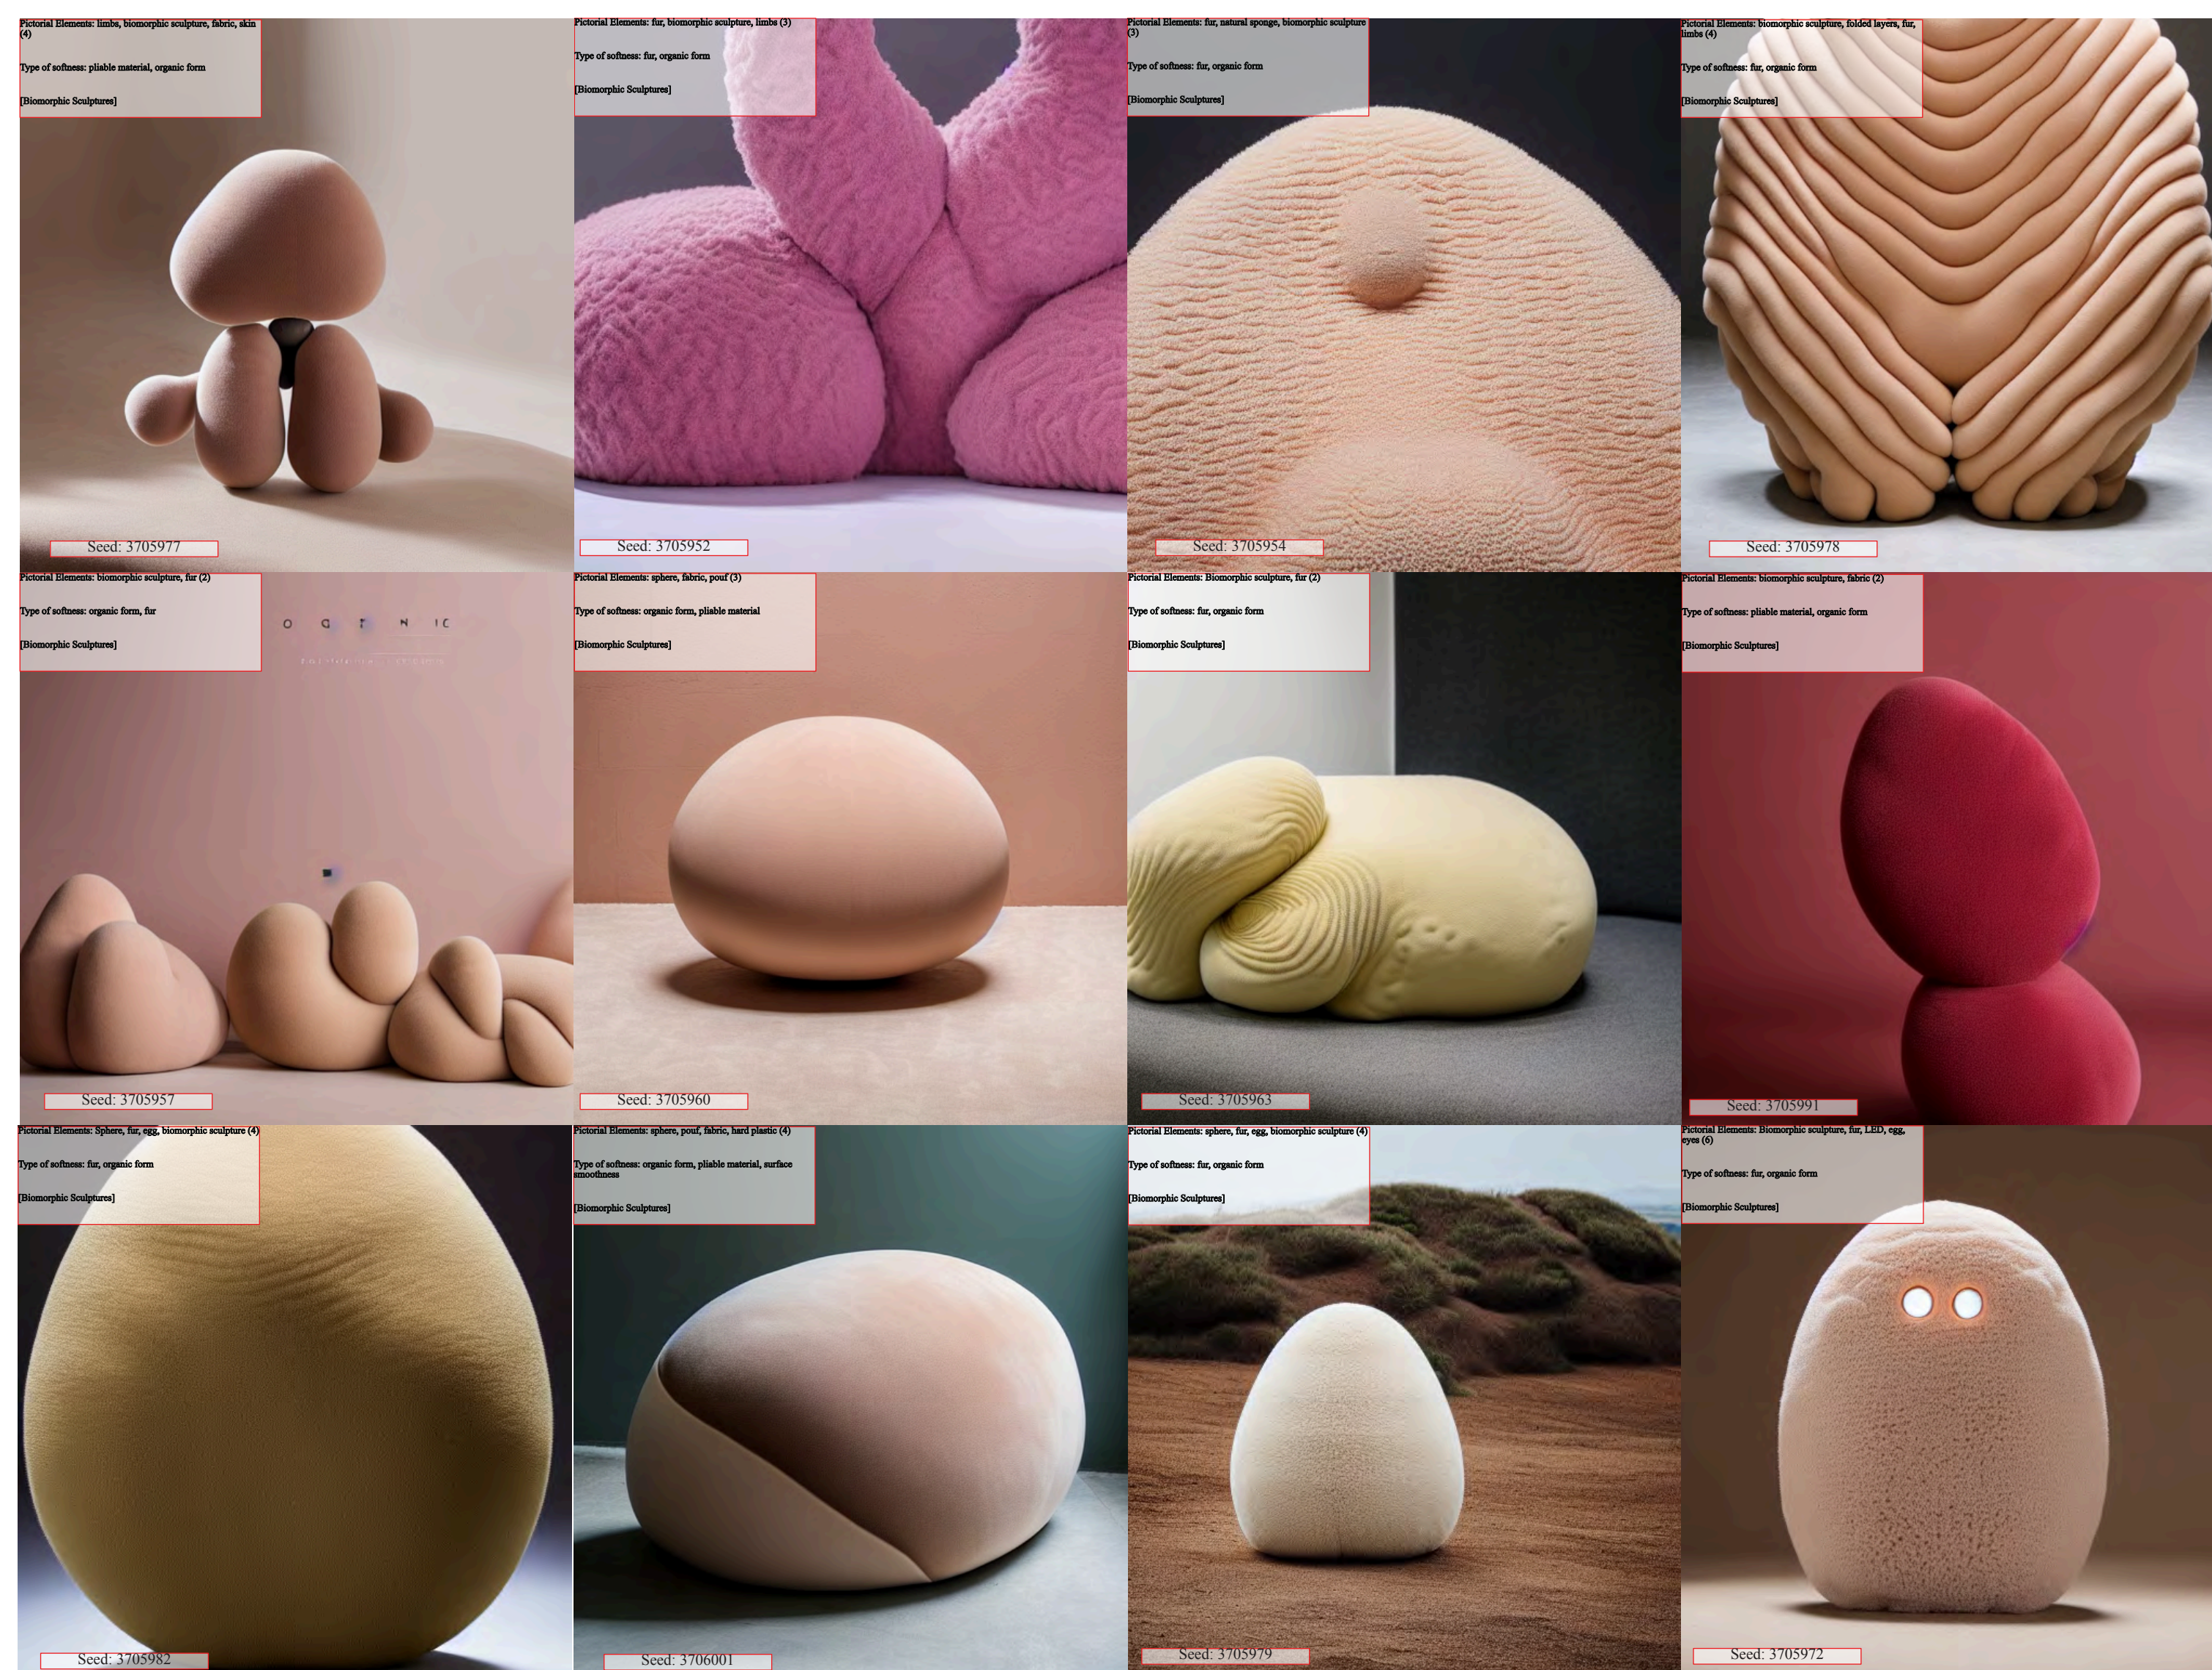

# Other (n=14)

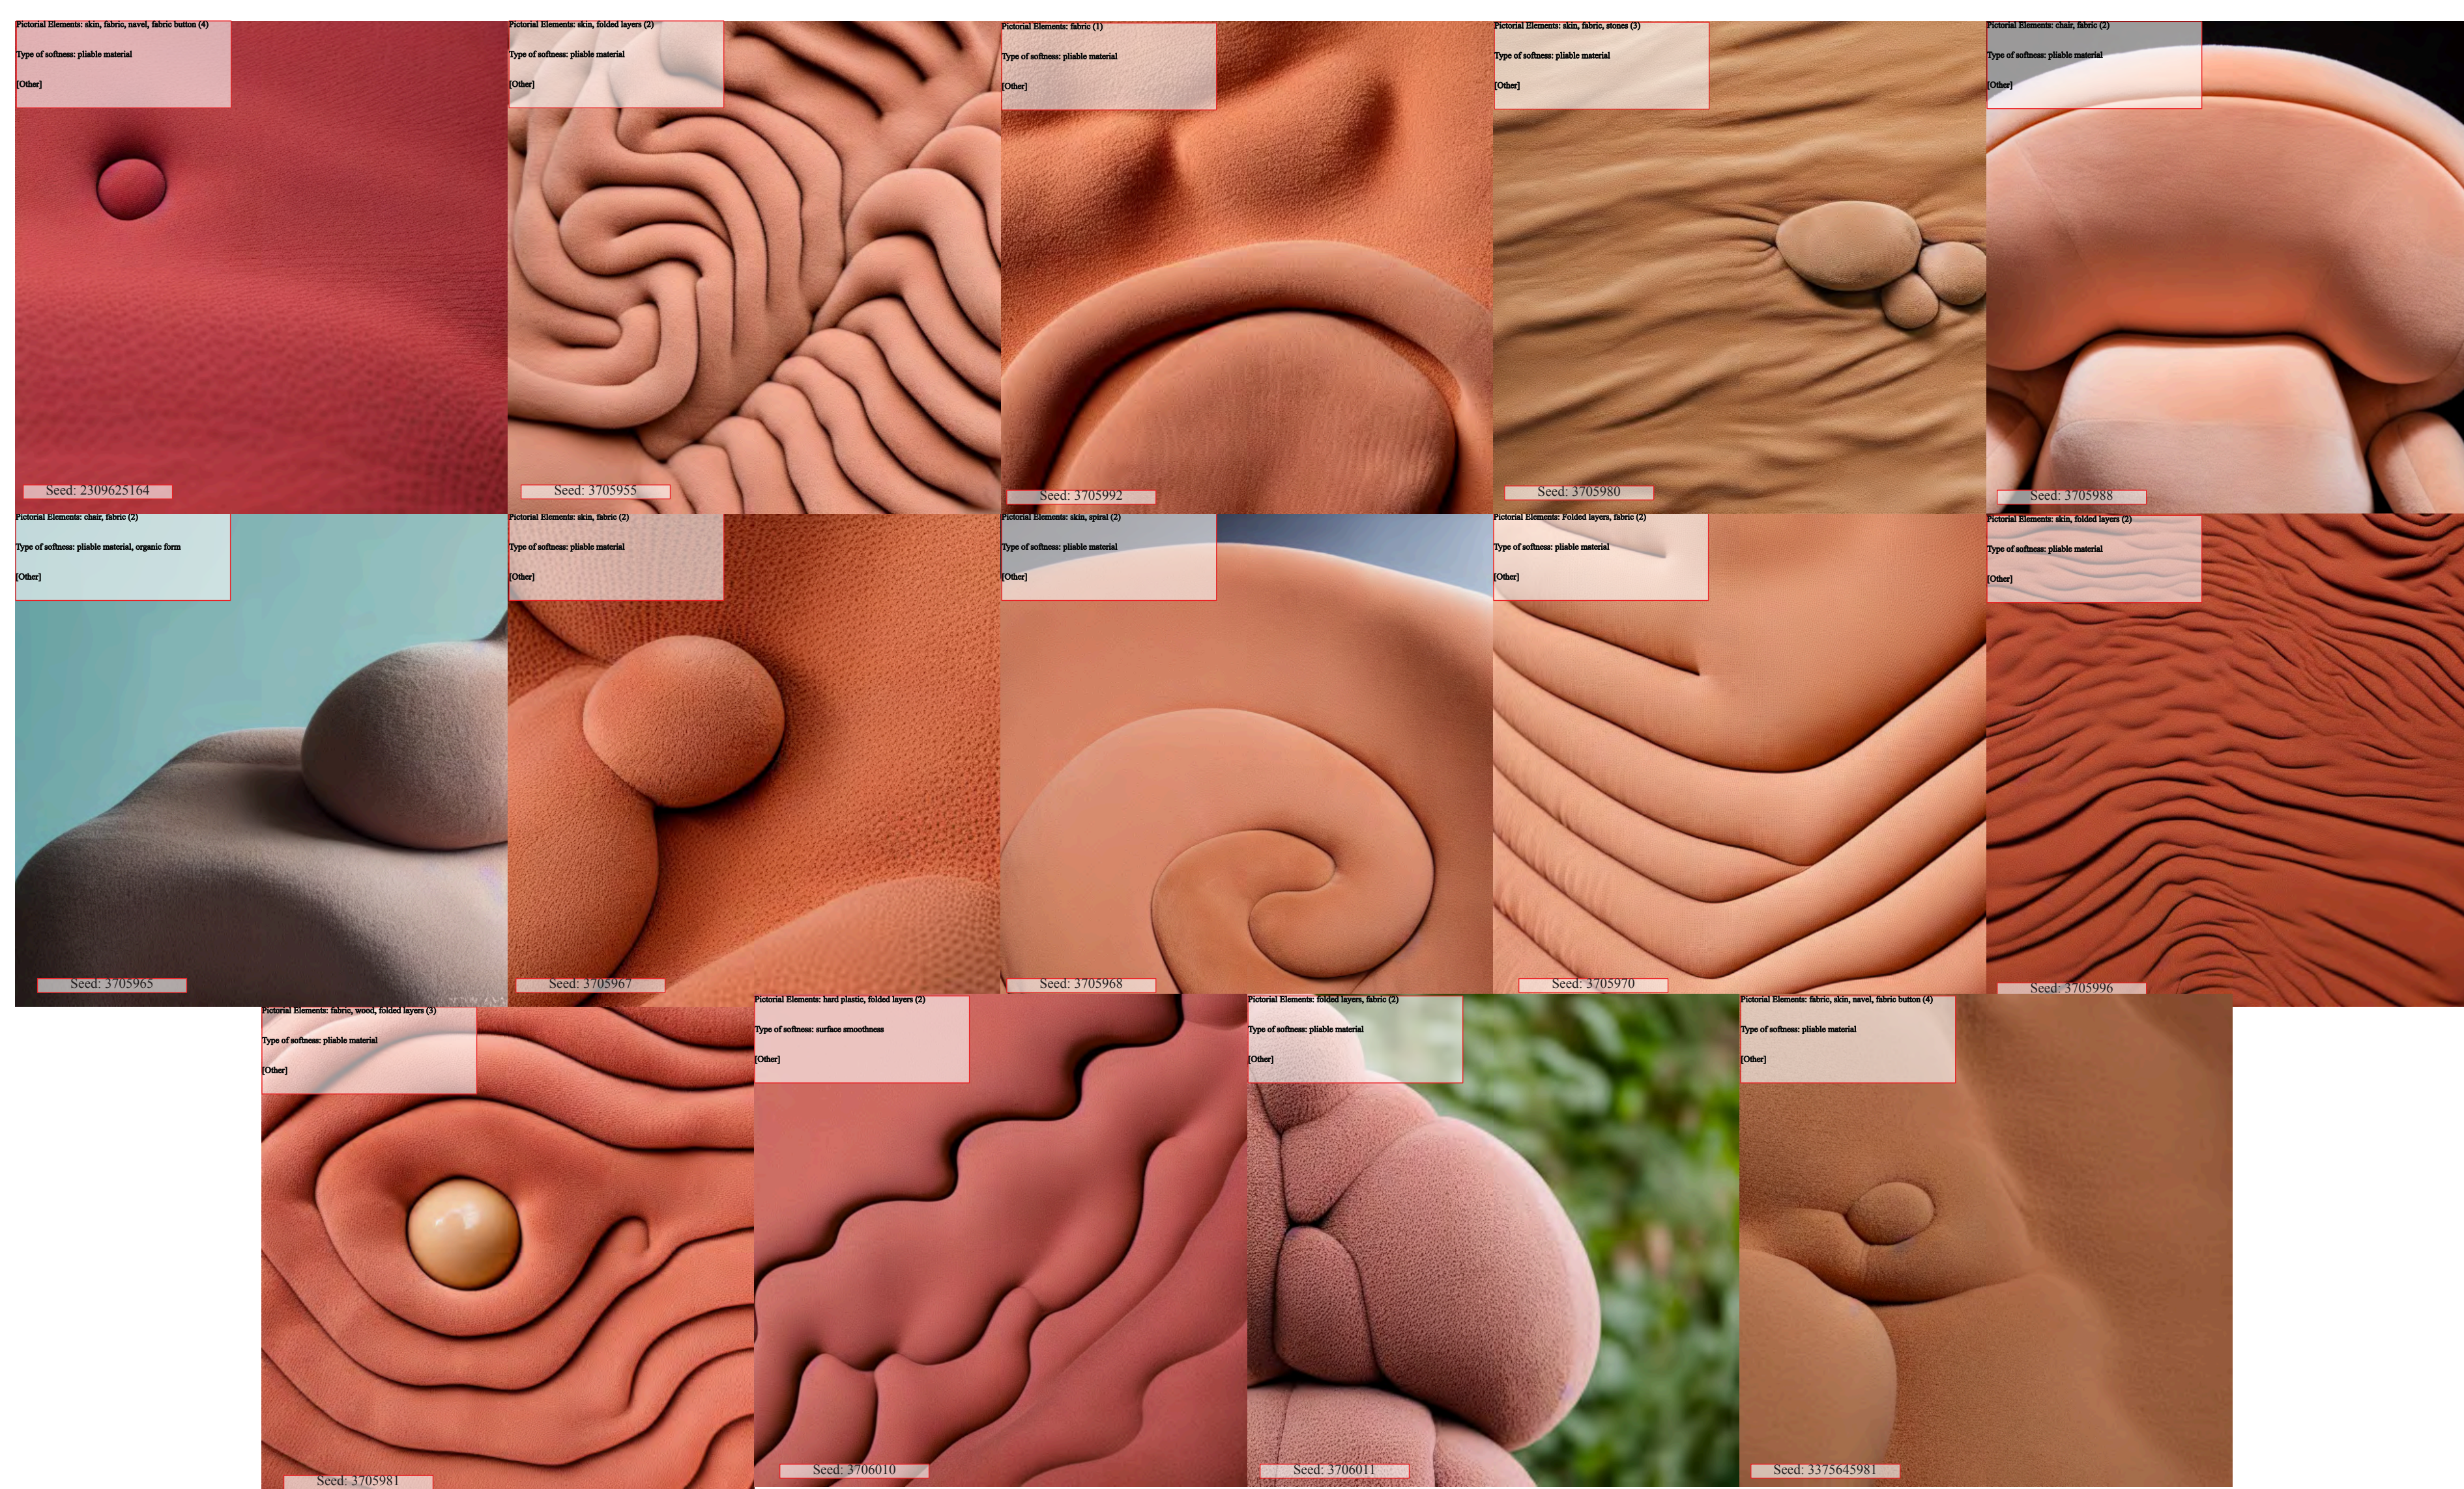

Supplement: DataSheet3.pdf [file DataSheet3.pdf]
