# Supplementary material for: Nature redux: interrogating biomorphism and soft robot aesthetics through generative AI
Source: PubMed Central journal article supplement (PMC11543949; doi:10.3389/frobt.2024.1472051), 2024-10-25

# Content Analysis - EXP.2

## 64 TTI+ITI generated outputs

### SETTINGS

*Prompt:* ((full-body image of a soft-bodied robot with a biologically inspired and biomorphic visual appearance, form and surface texture:1.3)), (robot made from organic looking material:2), (biomorphic form)), (robot surface has vivid organic polychromatic coloring and nuances:1.3), (biomorphic robot), (organic form), (organic surface), (((soft natural organism))), asymmetrical, bulbous, rugged, arciform, sweeping, annular, undulating and irregular contours, photography, RAW, DSLR, high resolution, HiRes, High quality

*Negative prompt:* (plastic), ((metal)), painting, drawing, cartoon, rendering, 3D, computer graphics, saturated, blurry, ((low resolution)), LoRes, (bad quality)

Steps: 50, Sampler: Euler a, CFG scale: 9, Size: 512x512, Model hash: 6ce0161689, Model: v1-5-pruned-emaonly, Denoising strength: 0.75, Version: v1.6.0

Time required to generate image set: 80 minutes 42.4 seconds

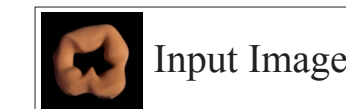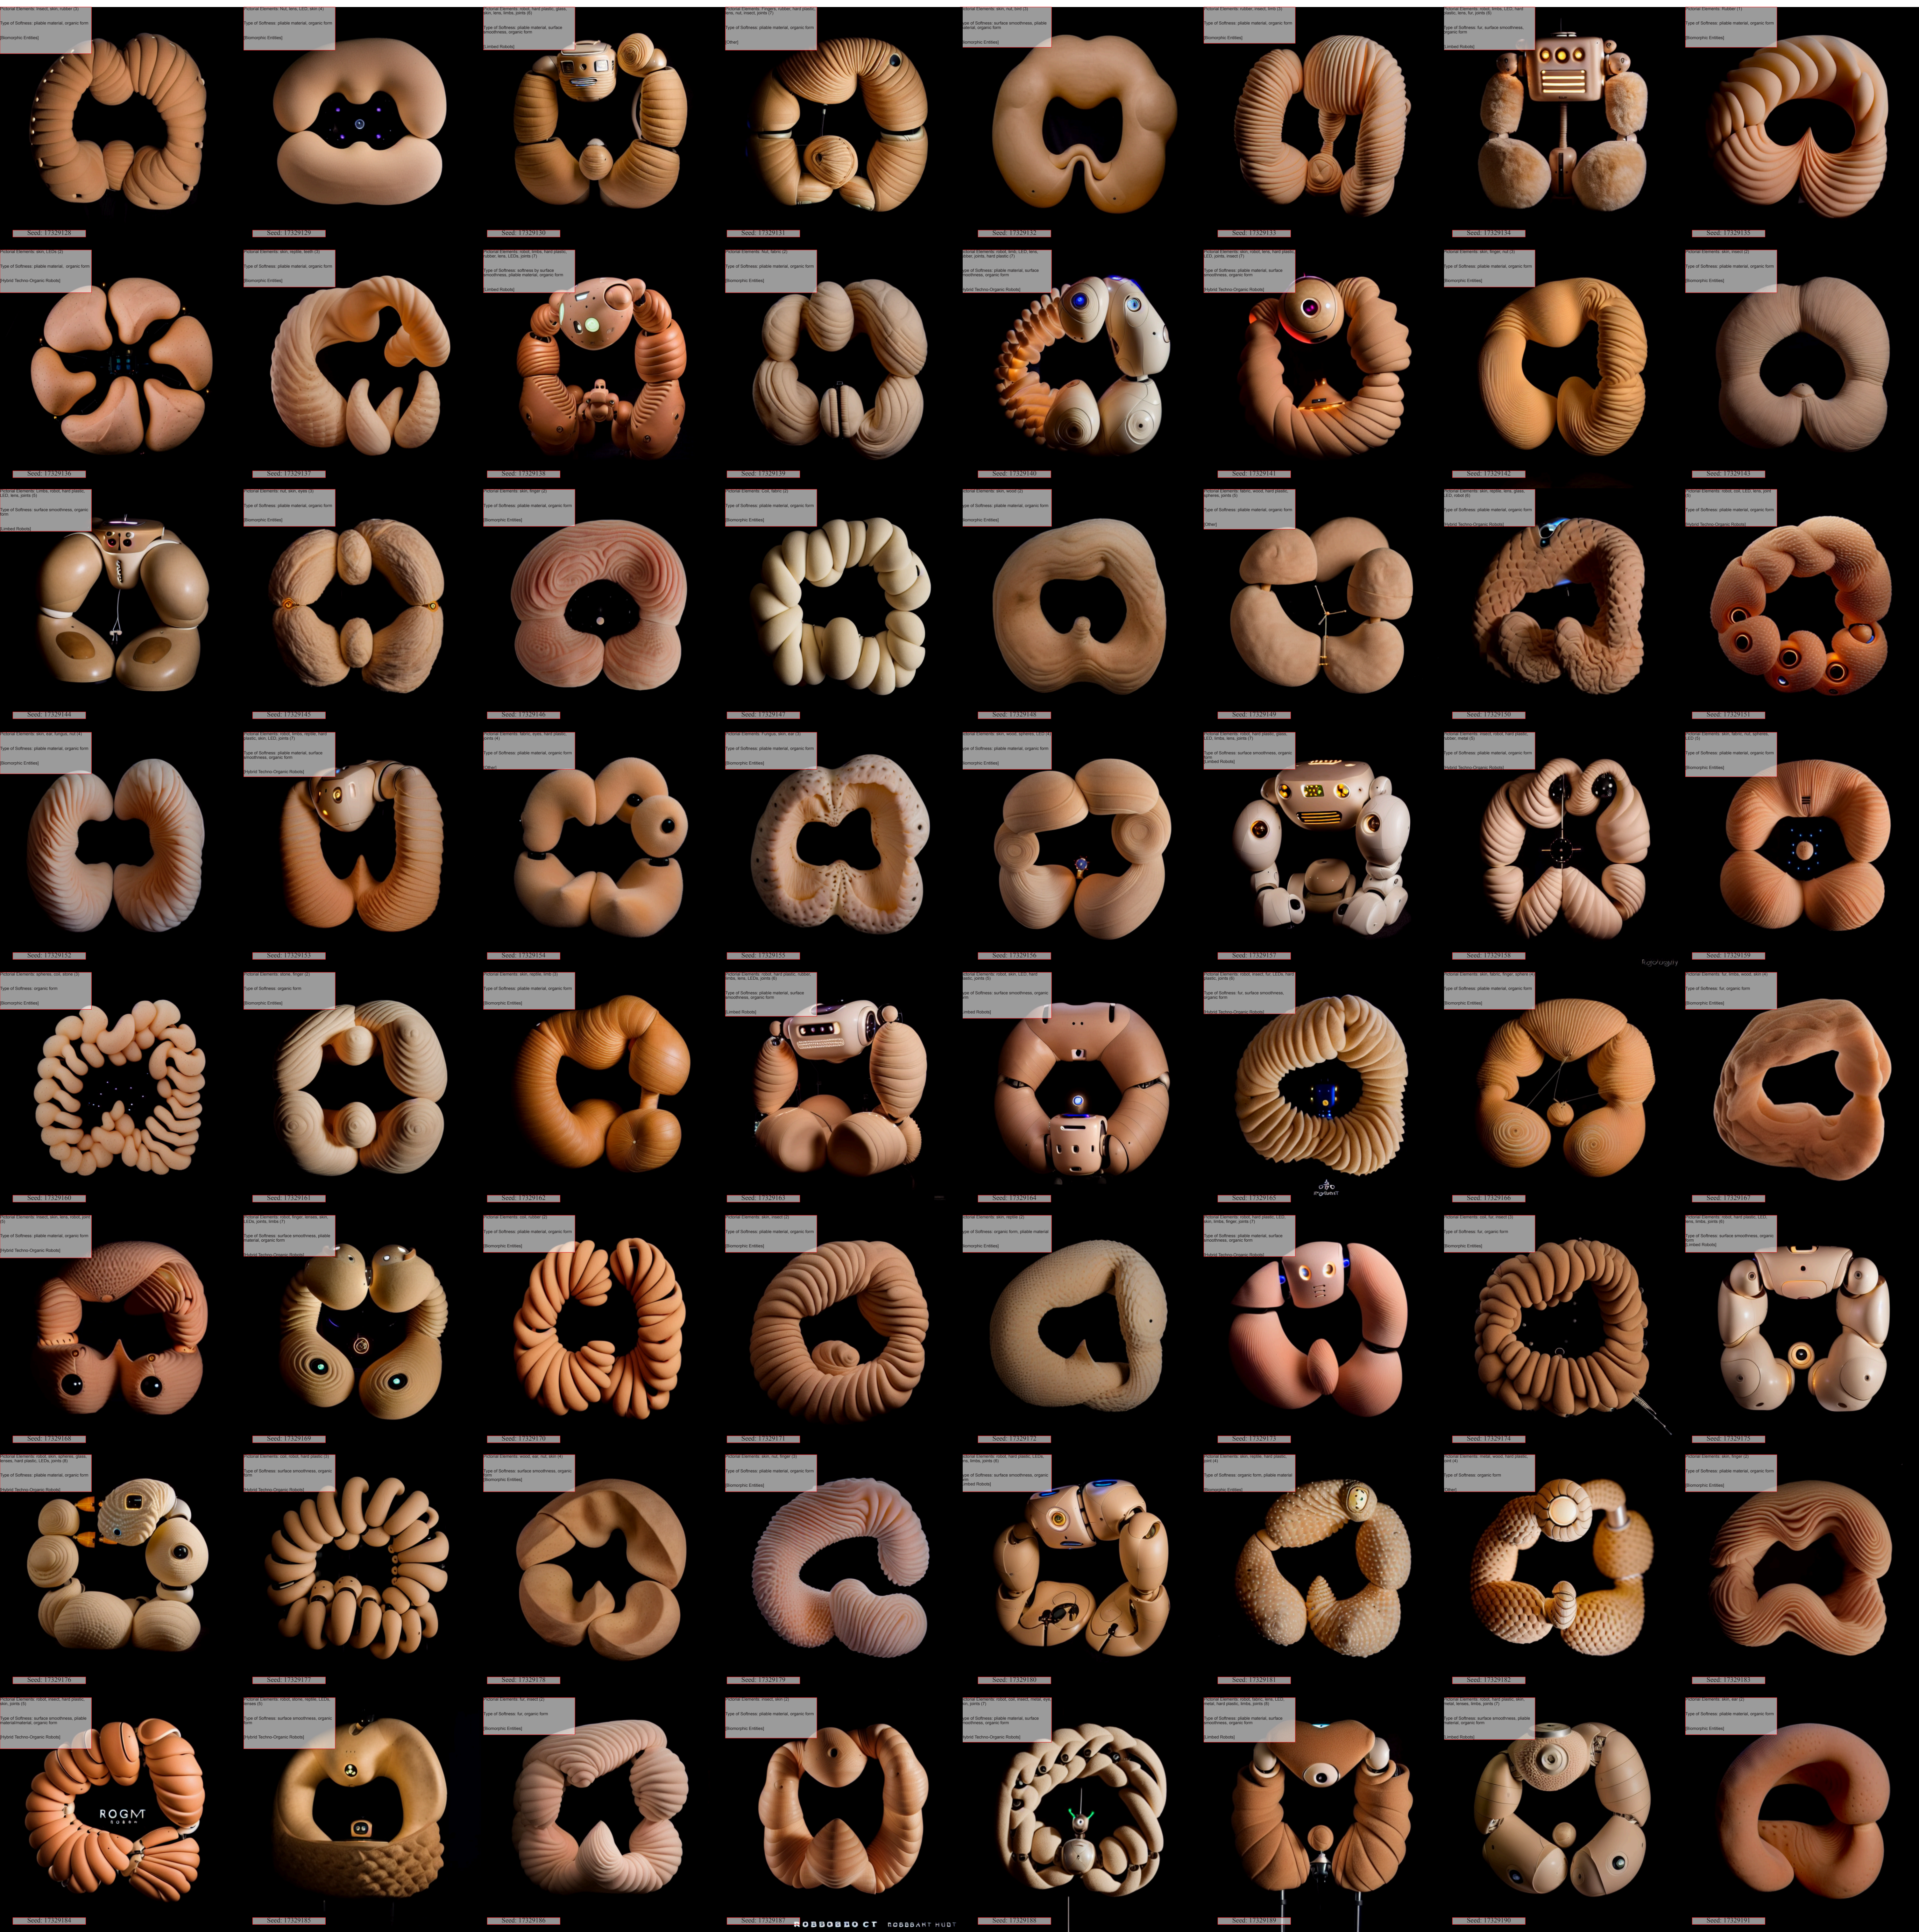

|    | <b>Pictorial Element</b> | <b>Number of Occurrences</b> |
|----|--------------------------|------------------------------|
| 1  | Skin                     | 37                           |
| 2  | Robot                    | 30                           |
| 3  | Joints                   | 27                           |
| 4  | Hard plastic             | 26                           |
| 5  | LED(s)                   | 24                           |
| 6  | Lens(es)                 | 22                           |
| 7  | Limb(s)                  | 17                           |
| 8  | Insect                   | 14                           |
| 9  | Rubber                   | 9                            |
| 10 | Nut                      | 9                            |
| 11 | Finger(s)                | 8                            |
| 12 | Fabric                   | 8                            |
| 13 | Reptile                  | 7                            |
| 14 | Coil                     | 7                            |
| 15 | Wood                     | 6                            |
| 16 | Sphere(s)                | 6                            |
| 17 | Fur                      | 6                            |
| 18 | Metal                    | 6                            |
| 19 | Eye(s)                   | 4                            |
| 20 | Glass                    | 4                            |
| 21 | Stone                    | 3                            |
| 22 | Ear(s)                   | 3                            |
| 23 | Fungus                   | 2                            |
| 24 | Teeth                    | 1                            |
| 25 | Bird                     | 1                            |

# Limbed Robots (n=11)

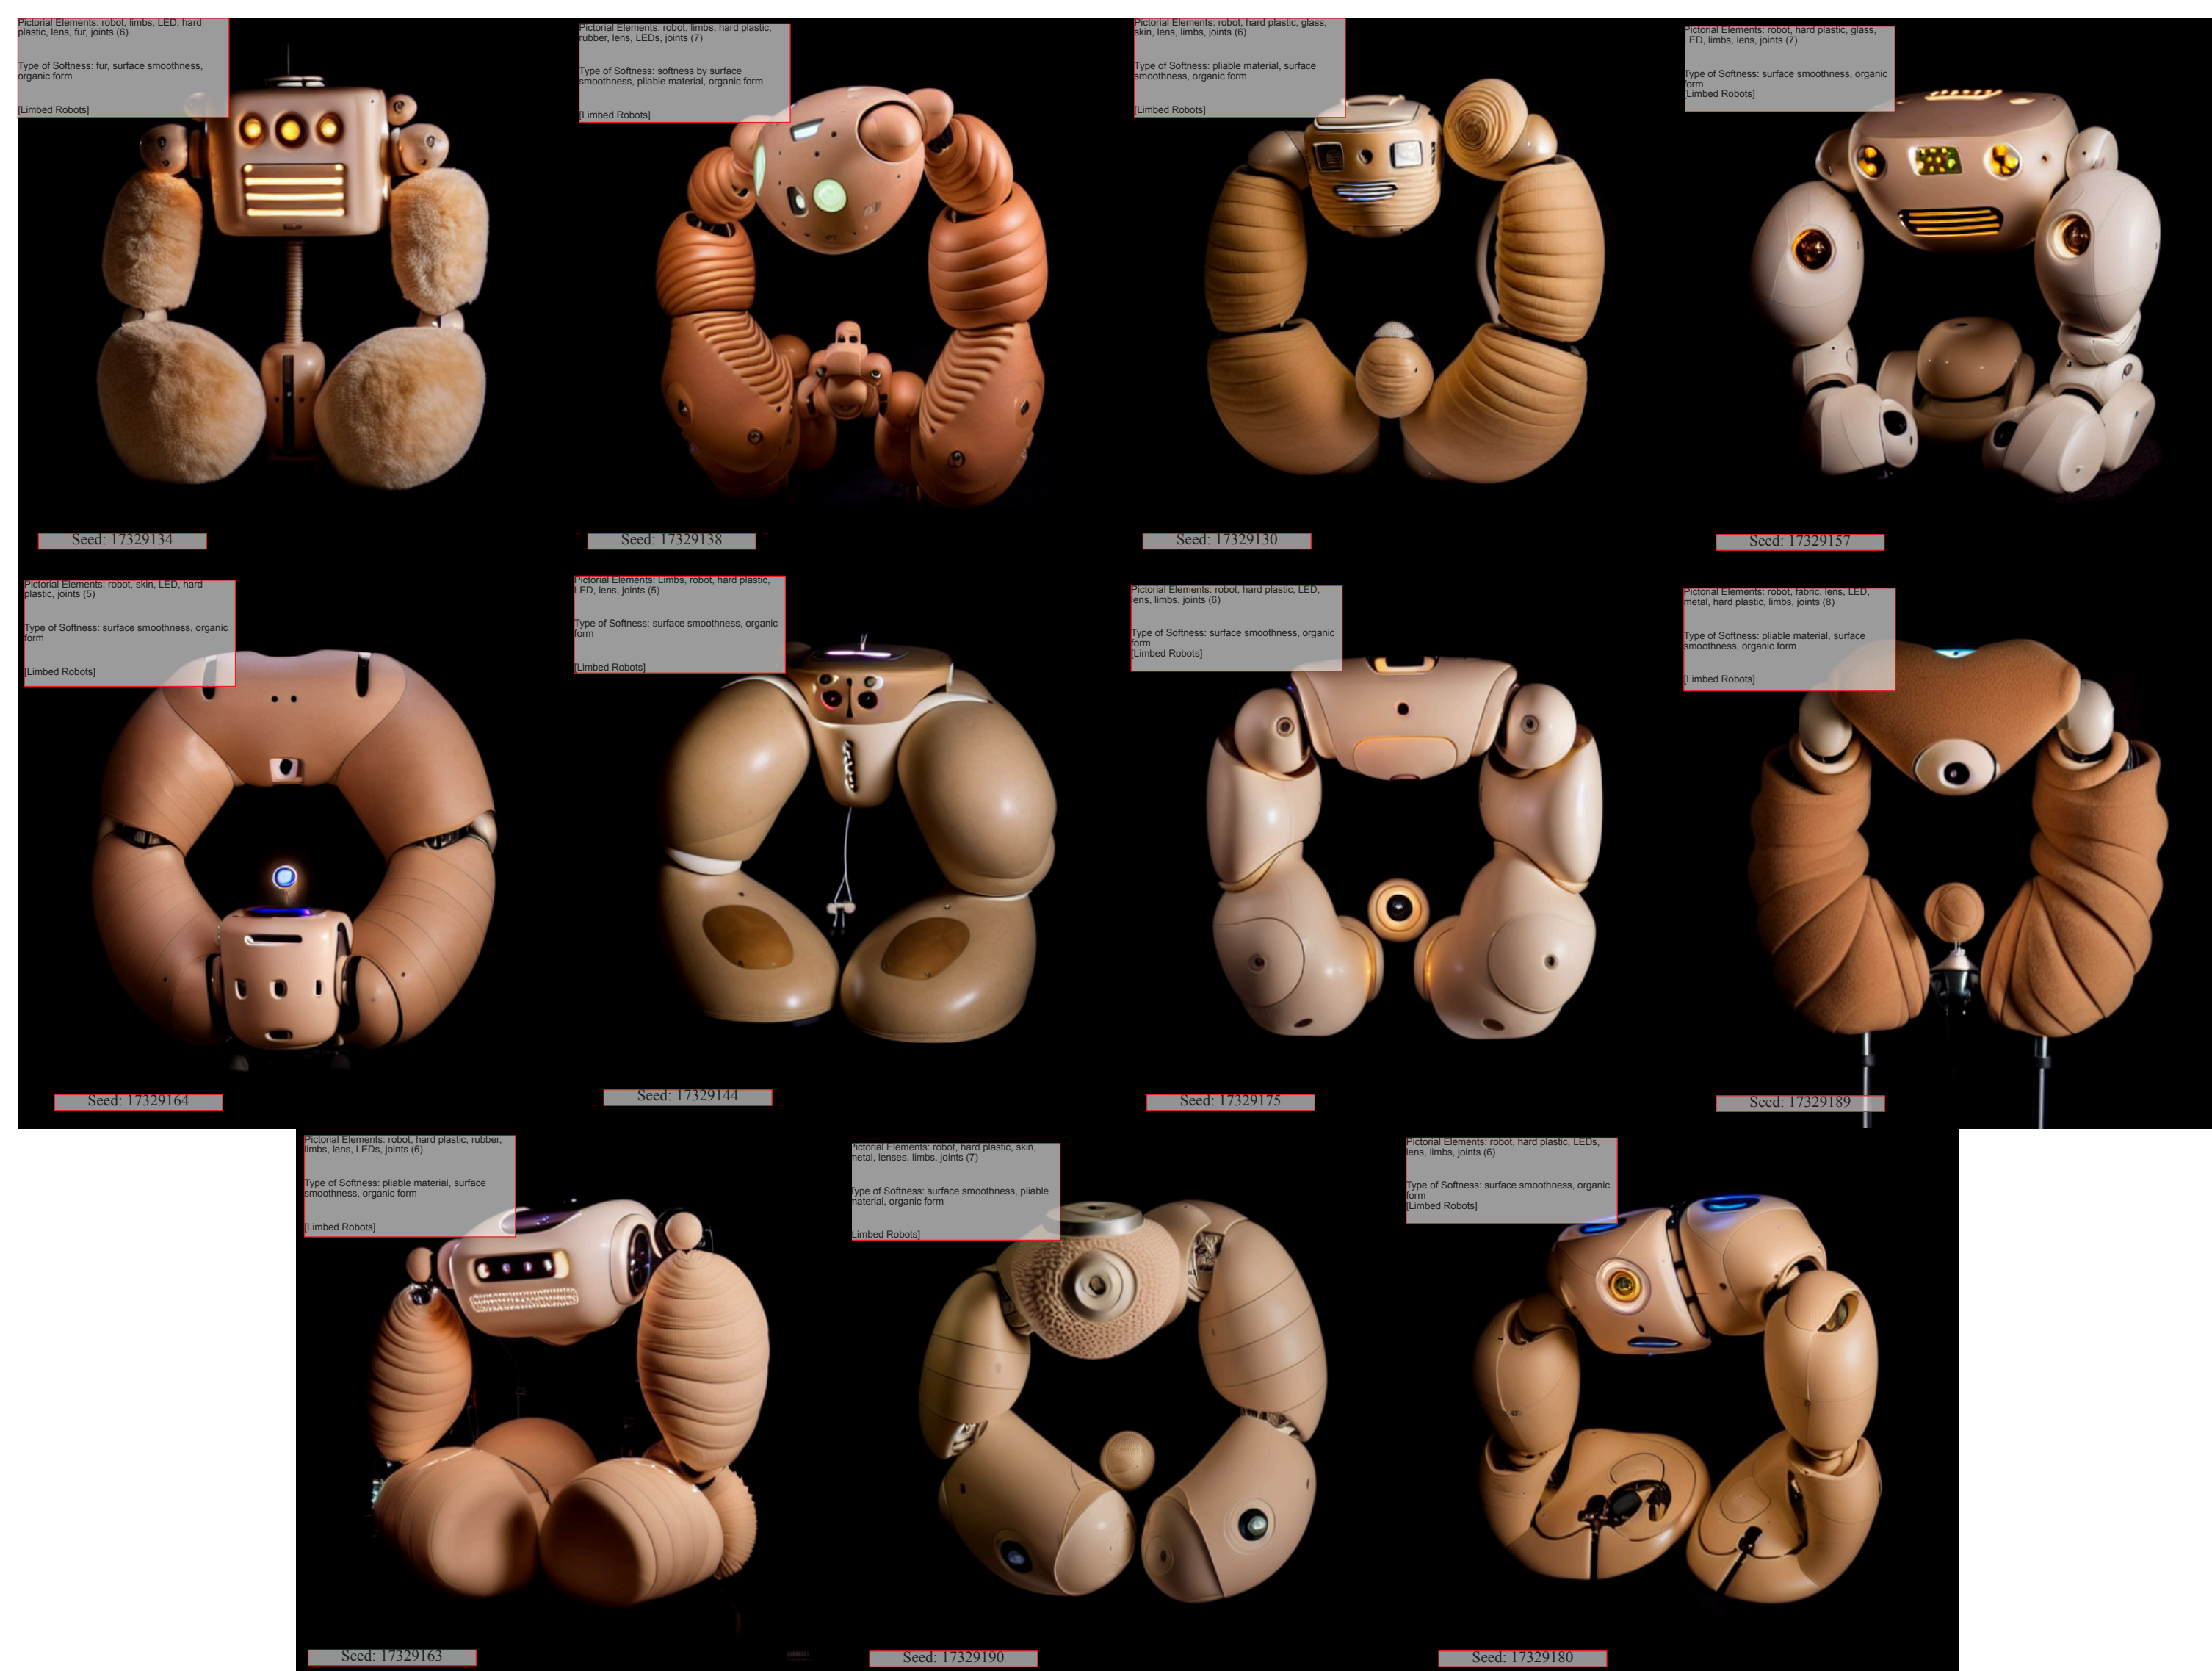

# Biomorphic Entities (n=33)

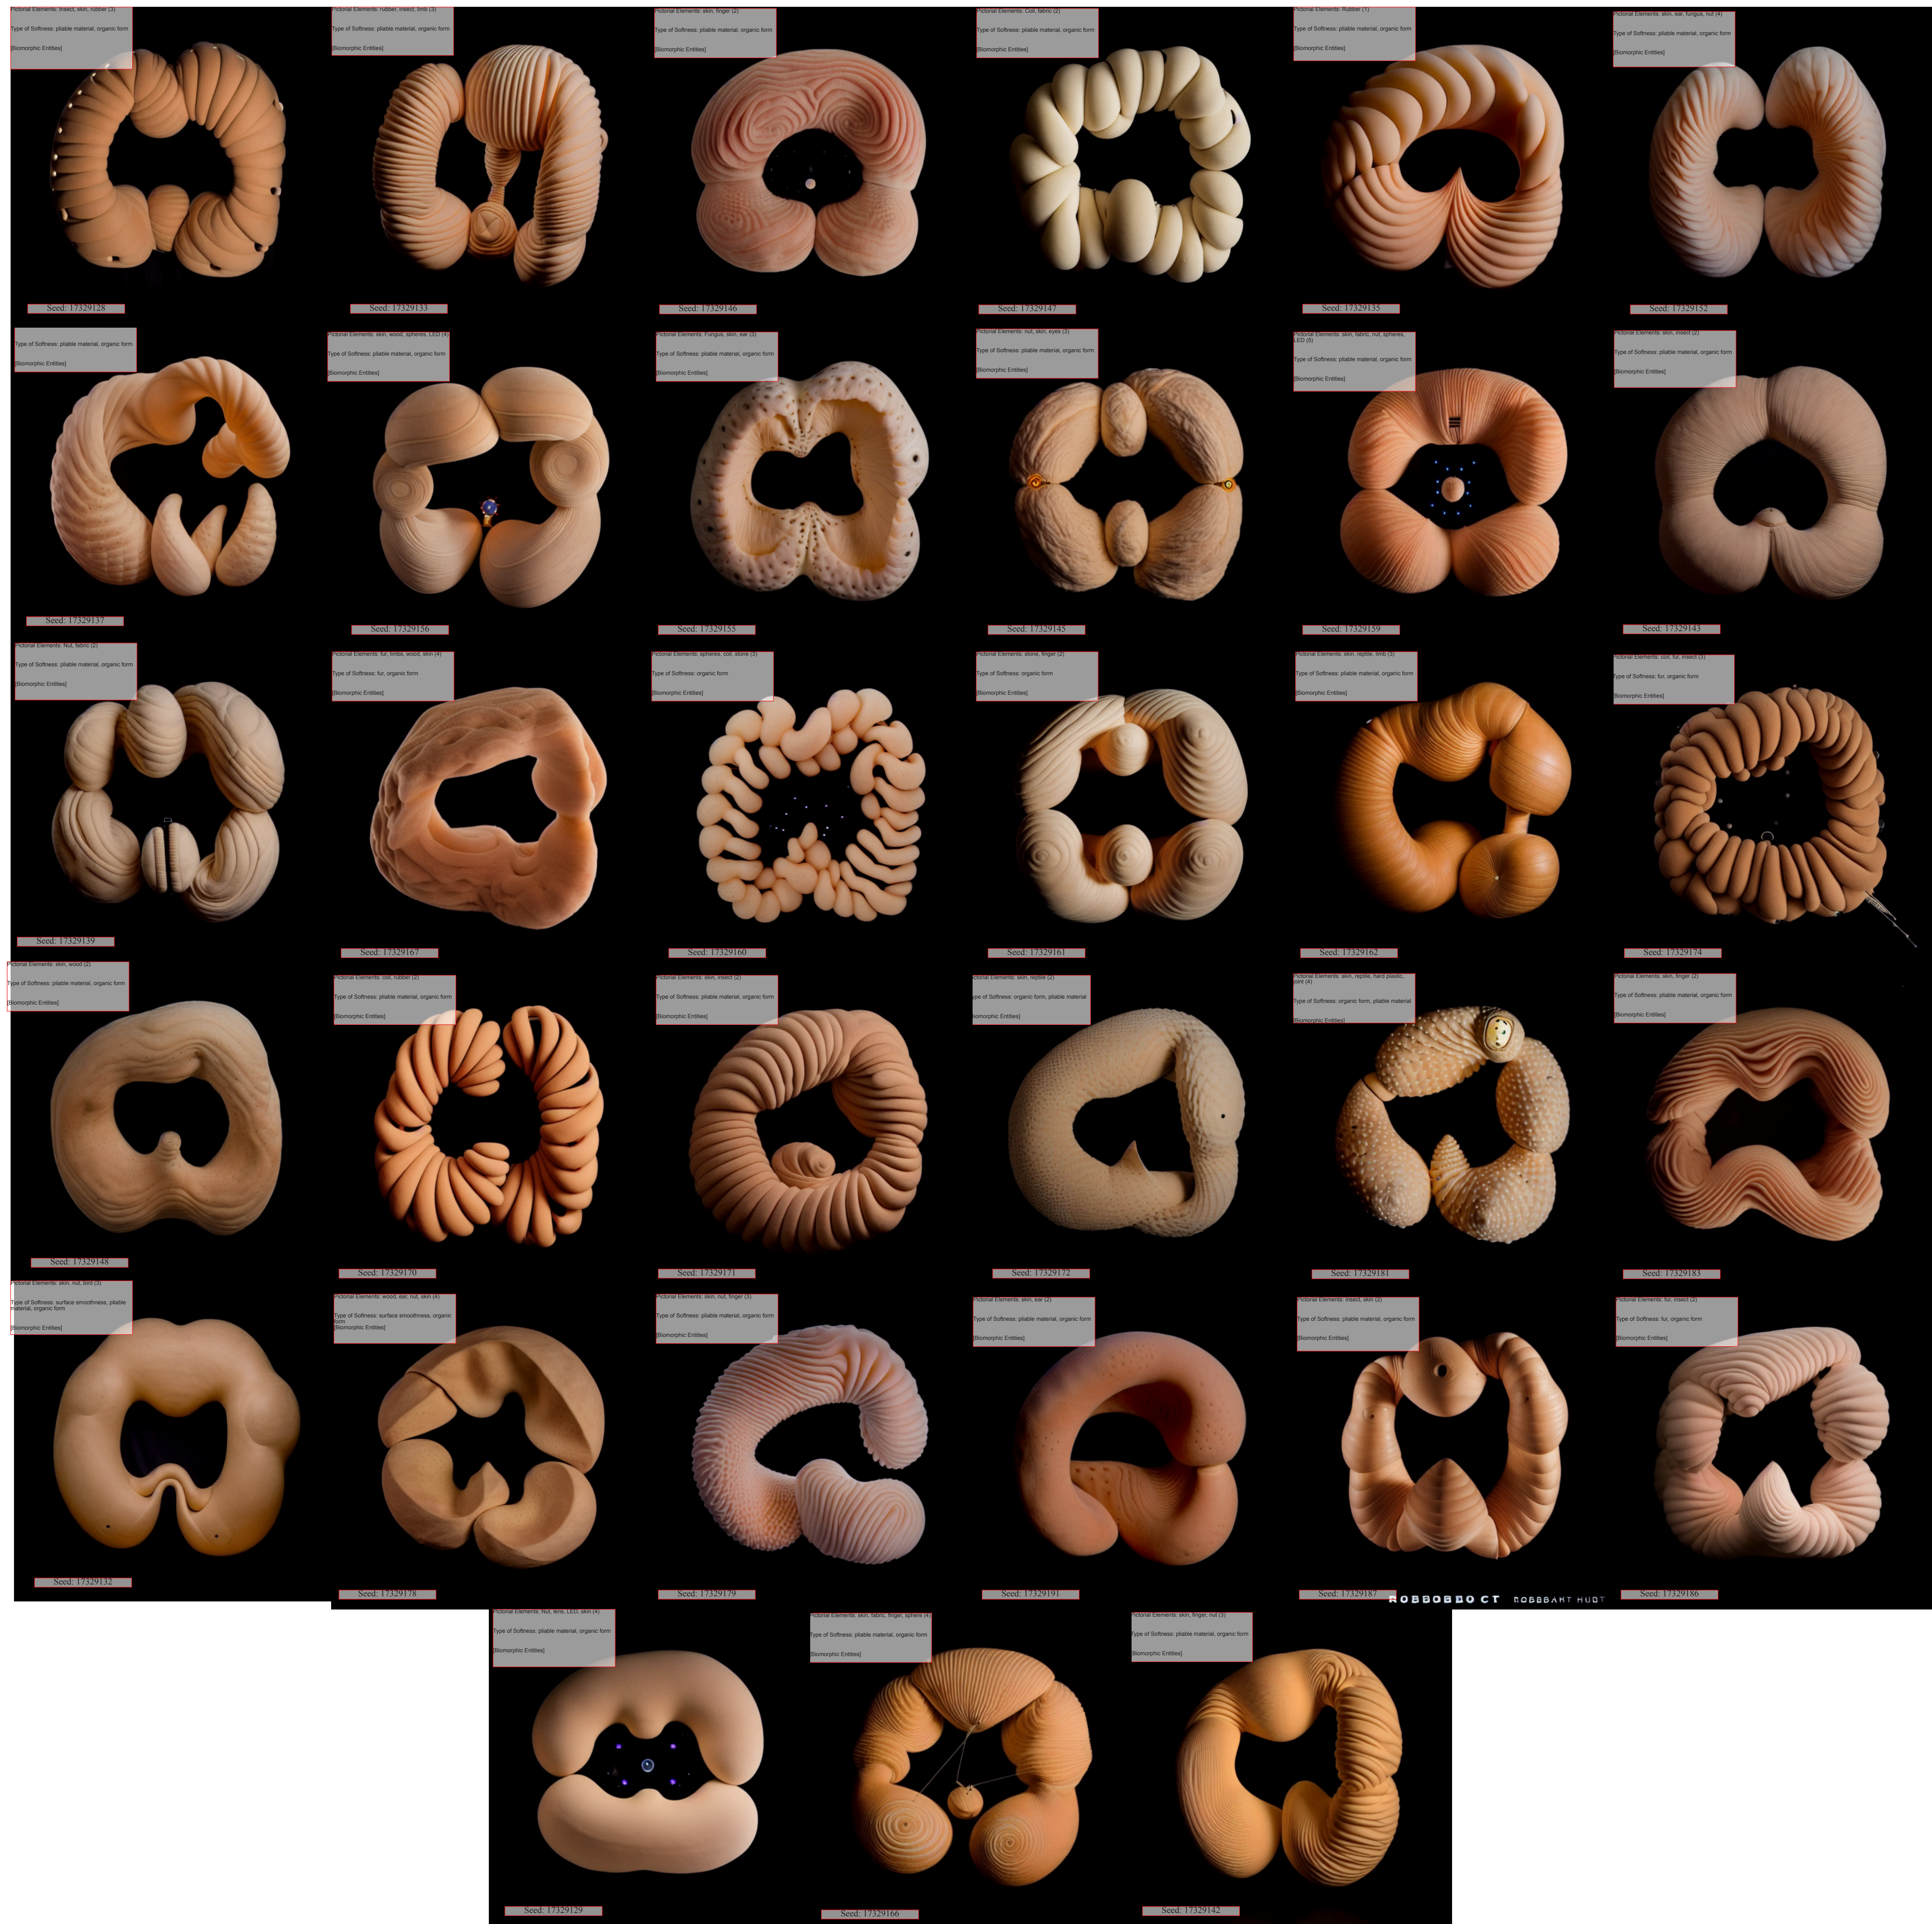

# Hybrid Techno-Organic Robots (n=16)

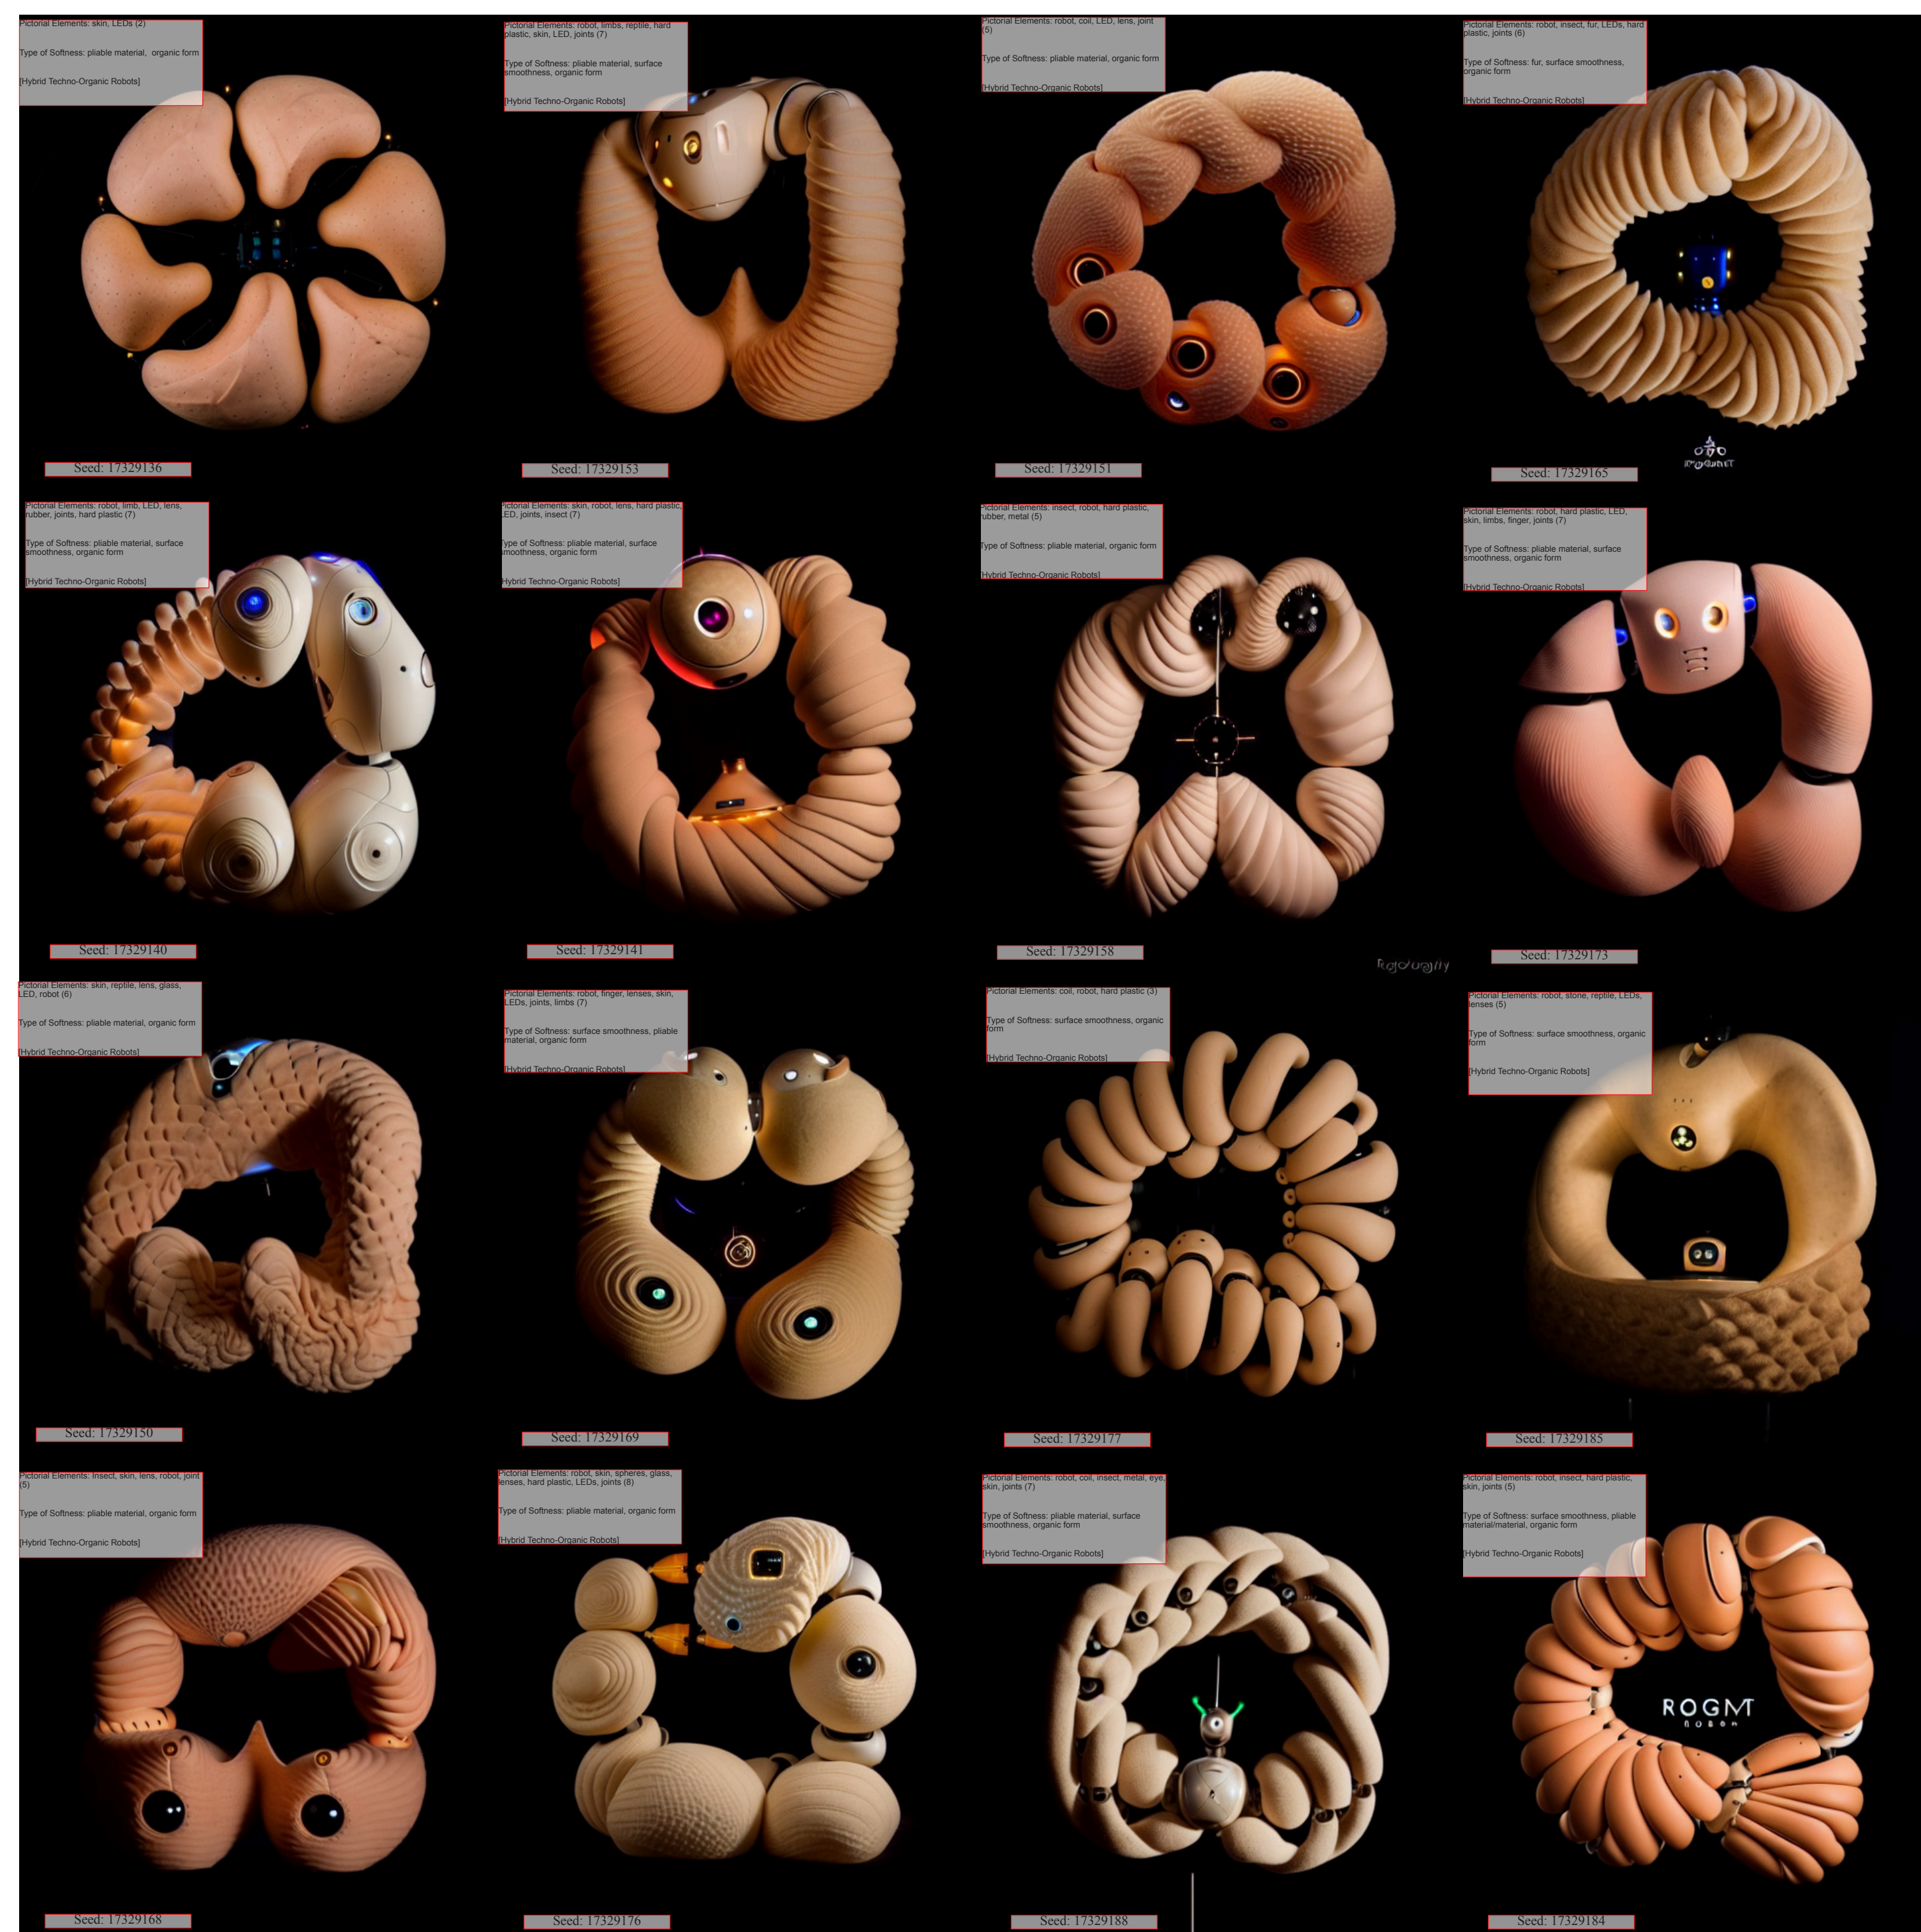

# Other (n=4)

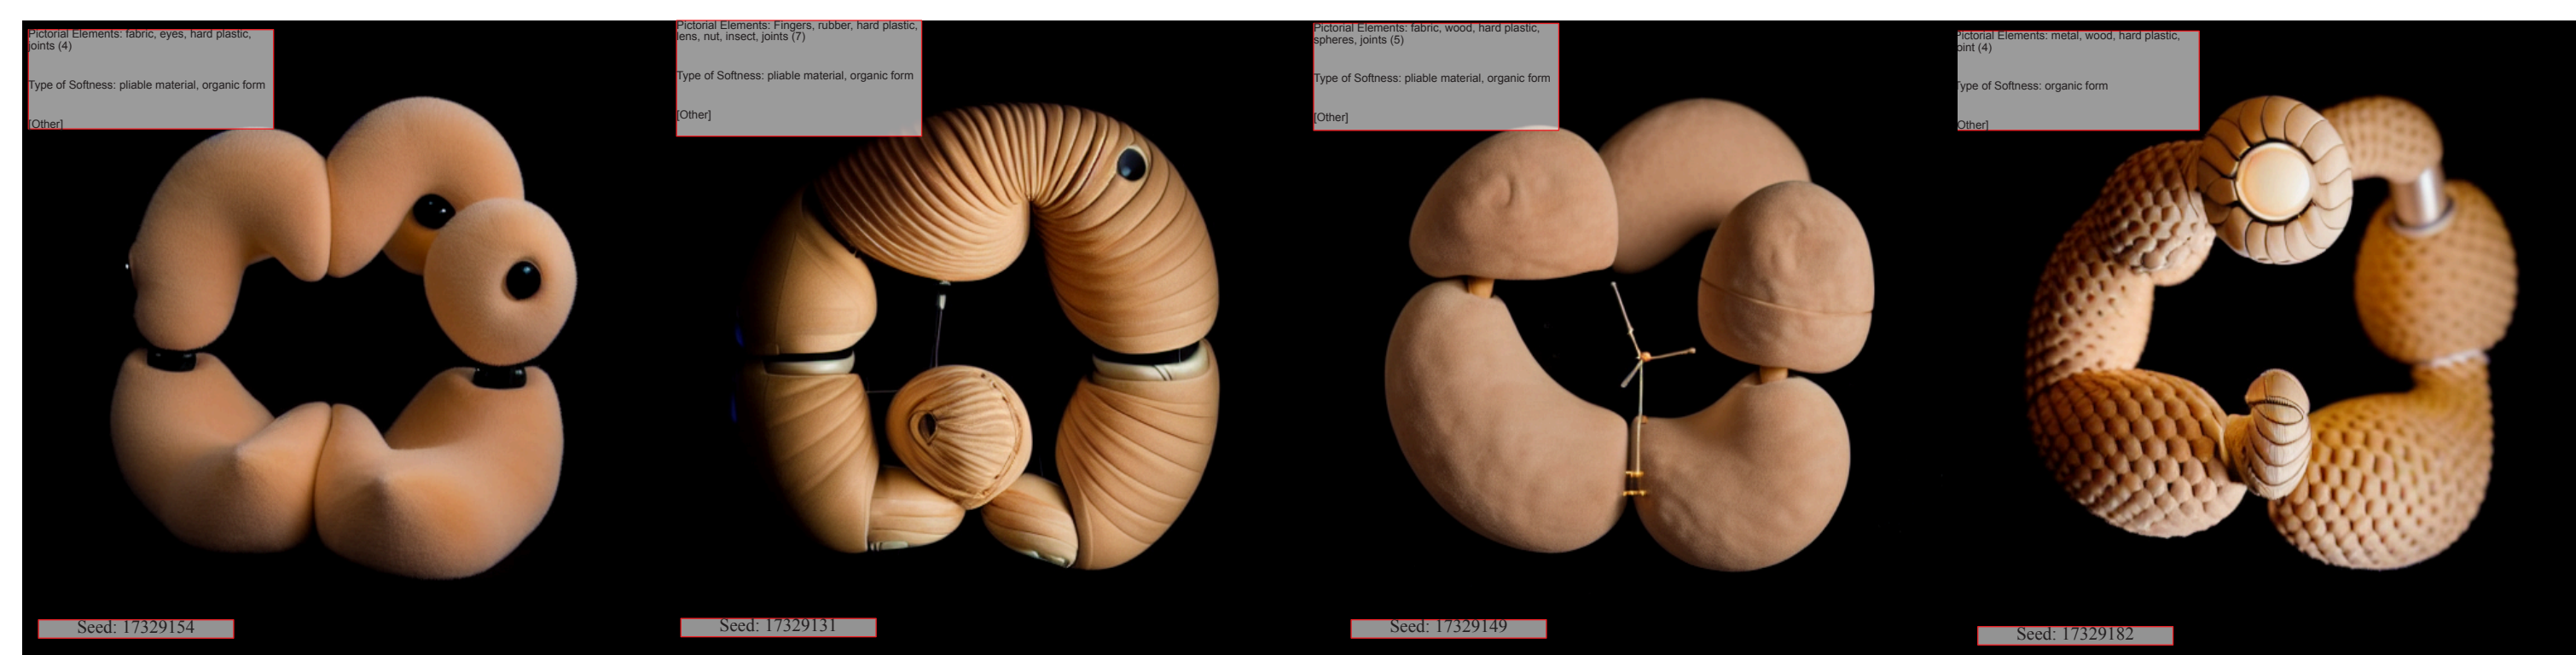

Supplement: DataSheet4.pdf [file DataSheet4.pdf]
